# Supplementary material for: Functional Loss of Two Ceramide Synthases Elicits Autophagy-Dependent Lifespan Extension in C. elegans
Source: PubMed Central journal article supplement (PMC3716707; doi:10.1371/journal.pone.0070087), 2013-07-19
Supplement: pone.0070087.s002.pdf [file pone.0070087.s002.pdf]

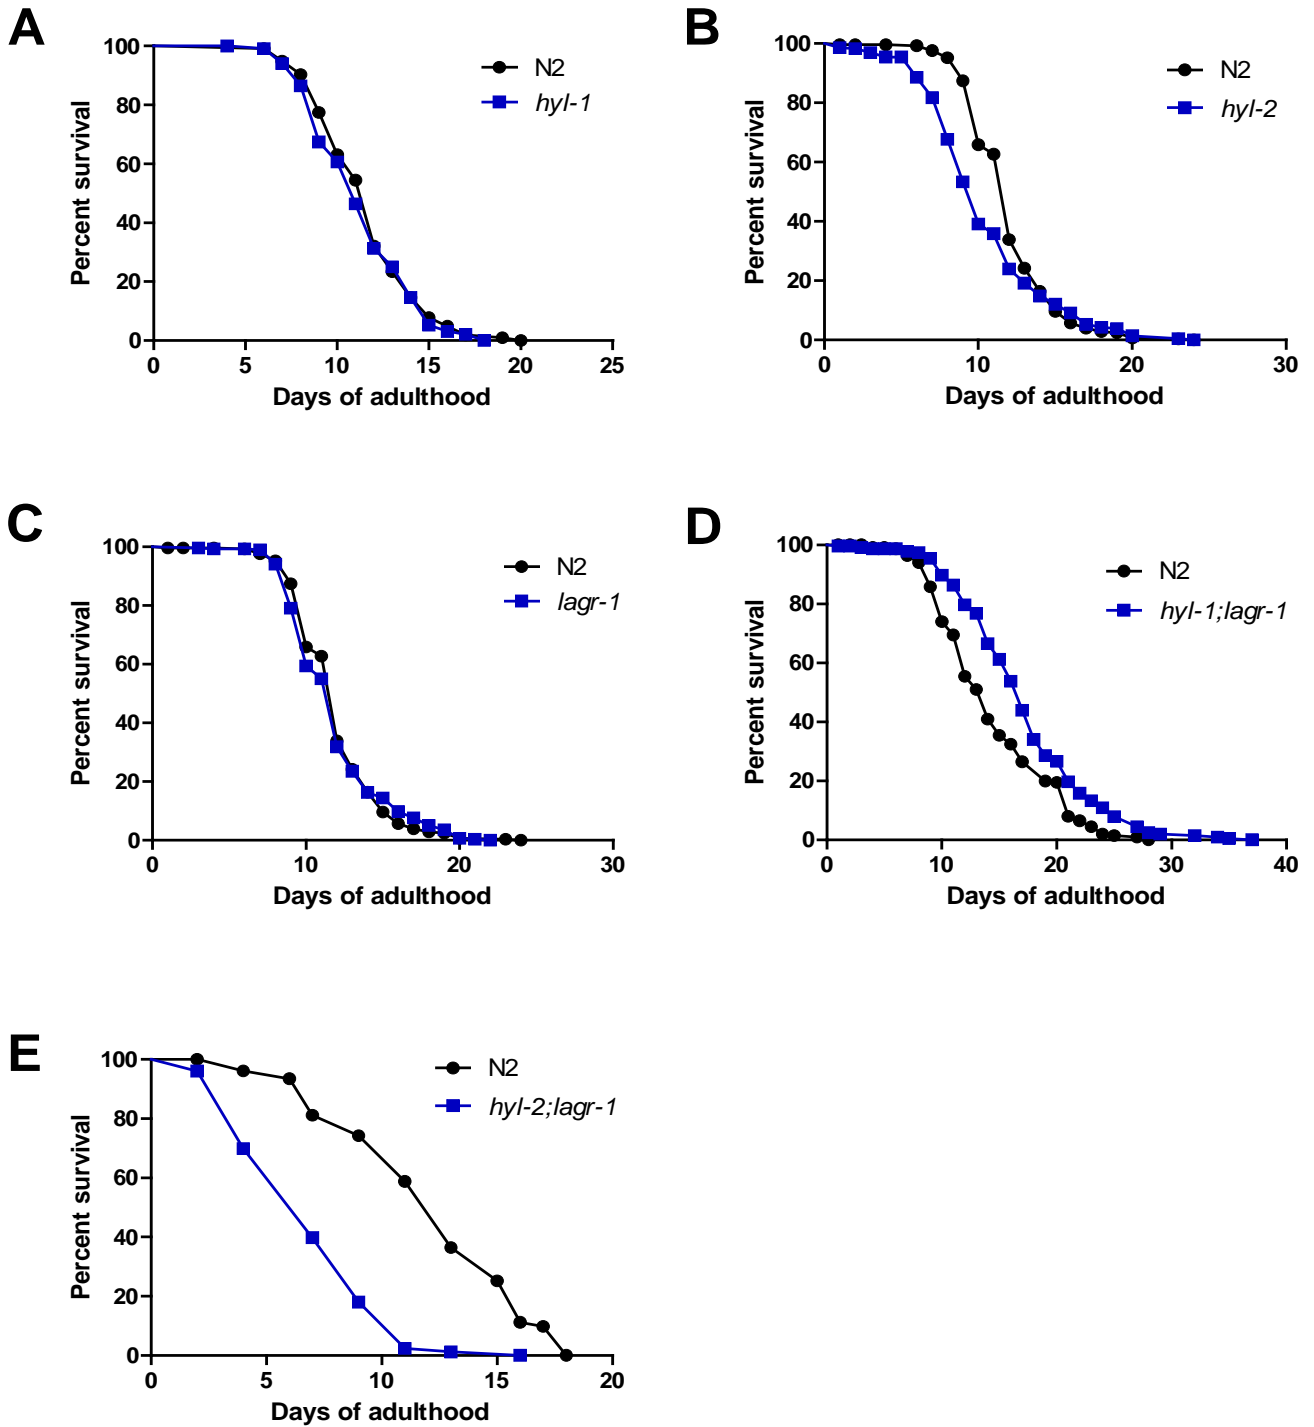

**F**

| Strain              | Adult Lifespan | Number of Animals <sup>a</sup> | Control Lifespan | Number of Control Animals | Percent Lifespan Change | <i>p</i> -Value Versus Control <sup>b</sup> |
|---------------------|----------------|--------------------------------|------------------|---------------------------|-------------------------|---------------------------------------------|
| <i>hyl-1</i>        | 11             | 101/120 (1)                    | 12               | 105/120 (1)               | -8.3%                   | 0.3592                                      |
| <i>hyl-2</i>        | 10             | 224/300 (2)                    | 12               | 282/300 (2)               | -16.7%                  | <0.0001                                     |
| <i>lagr-1</i>       | 12             | 278/300 (2)                    | 12               | 282/300 (2)               | 0.0%                    | 0.1651                                      |
| <i>hyl-1;lagr-1</i> | 17             | 205/240 (2)                    | 14               | 202/240 (2)               | 21.4%                   | <0.0001                                     |
| <i>hyl-2;lagr-1</i> | 7              | 87/100 (1)                     | 13               | 72/80 (1)                 | -46.2%                  | <0.0001                                     |
