# Supplementary material for: Functional Loss of Two Ceramide Synthases Elicits Autophagy-Dependent Lifespan Extension in C. elegans
Source: PubMed Central journal article supplement (PMC3716707; doi:10.1371/journal.pone.0070087), 2013-07-19
Supplement: pone.0070087.s003.pdf [file pone.0070087.s003.pdf]

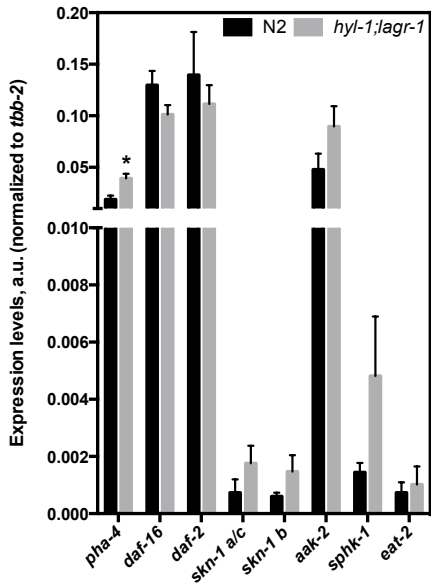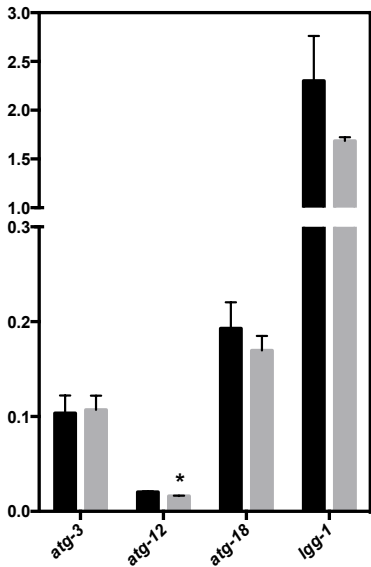

Figure S3
