# Supplementary material for: Functional Loss of Two Ceramide Synthases Elicits Autophagy-Dependent Lifespan Extension in C. elegans
Source: PubMed Central journal article supplement (PMC3716707; doi:10.1371/journal.pone.0070087), 2013-07-19

■ DA2123

■ DA2123;*hyl-1*;*lagr-1*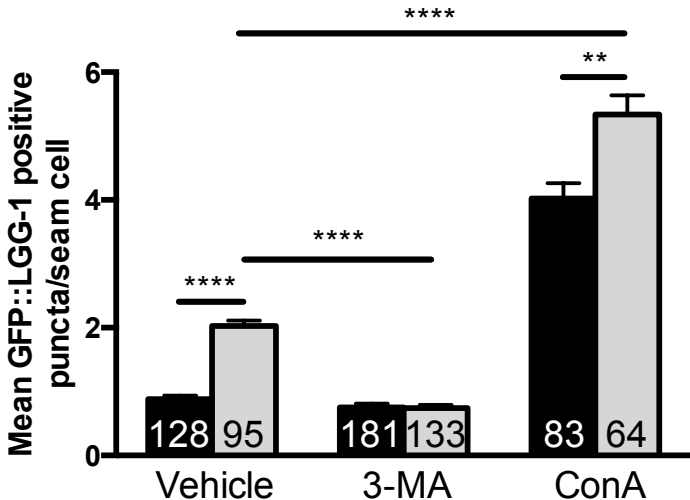

Supplement: pone.0070087.s005.pdf [file pone.0070087.s005.pdf]
