# Supplementary material for: Functional Loss of Two Ceramide Synthases Elicits Autophagy-Dependent Lifespan Extension in C. elegans
Source: PubMed Central journal article supplement (PMC3716707; doi:10.1371/journal.pone.0070087), 2013-07-19

A

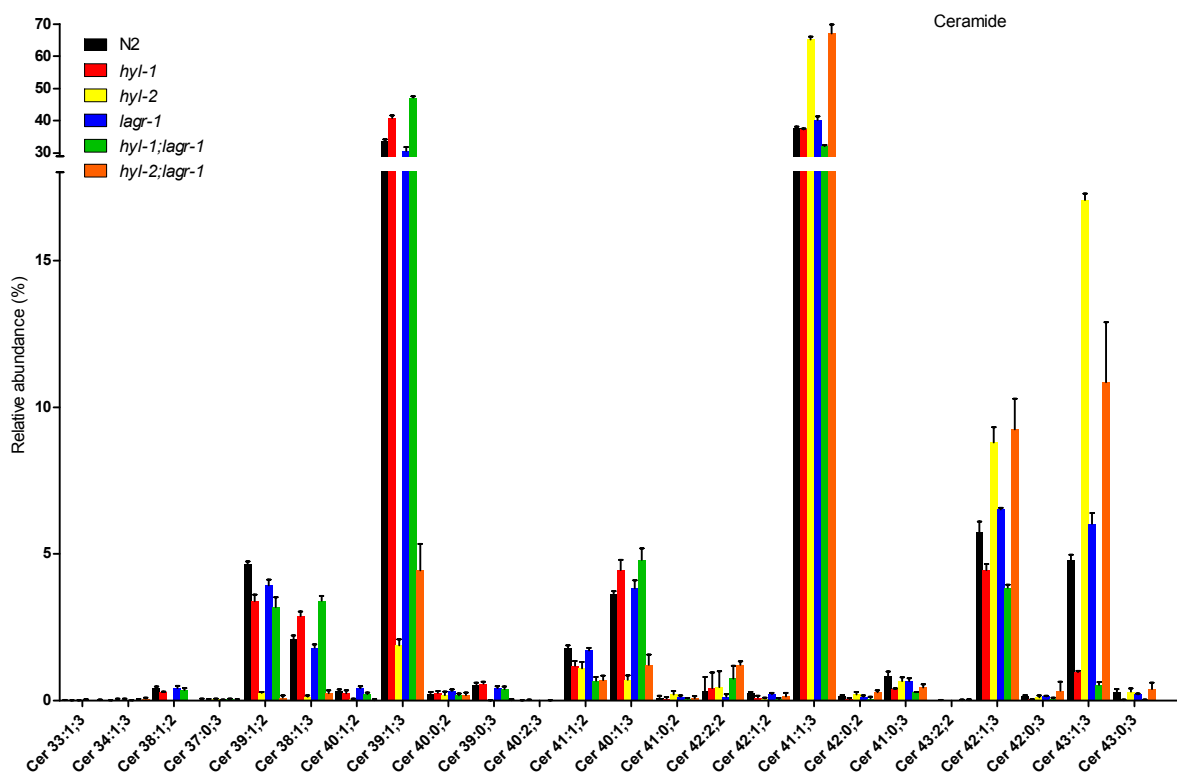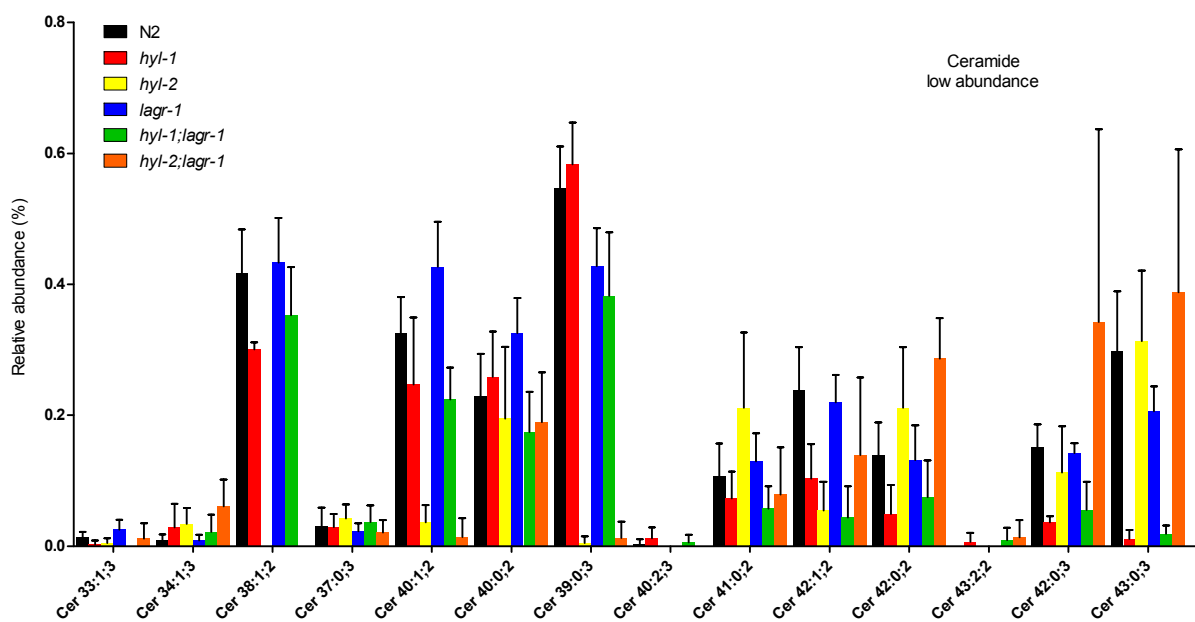

**B**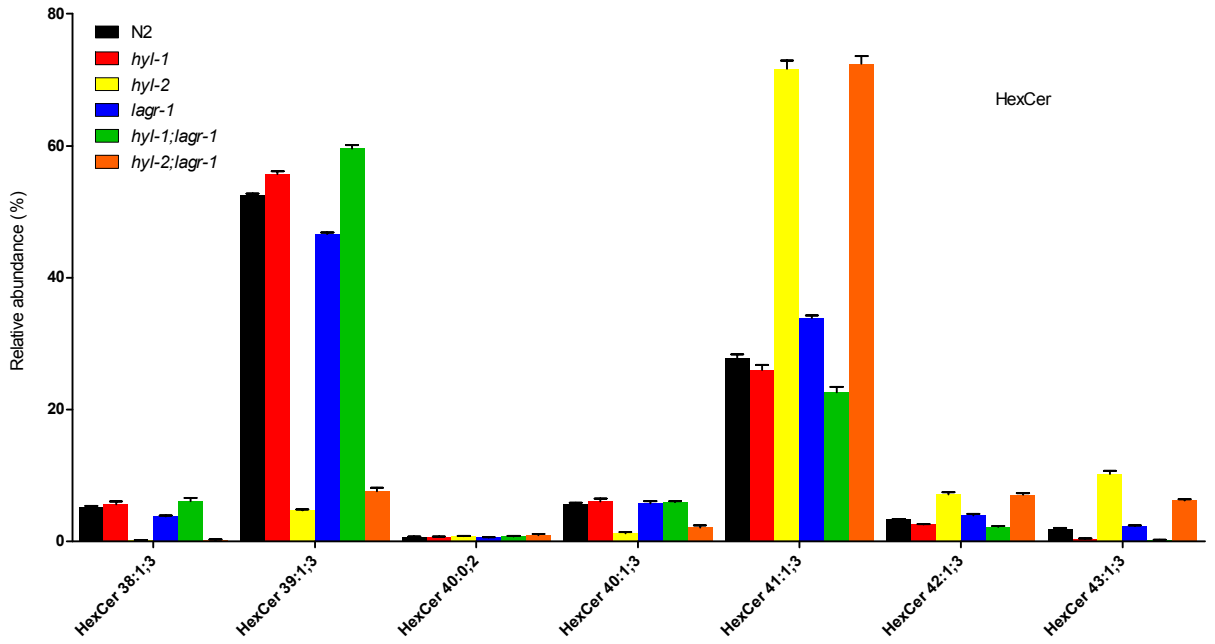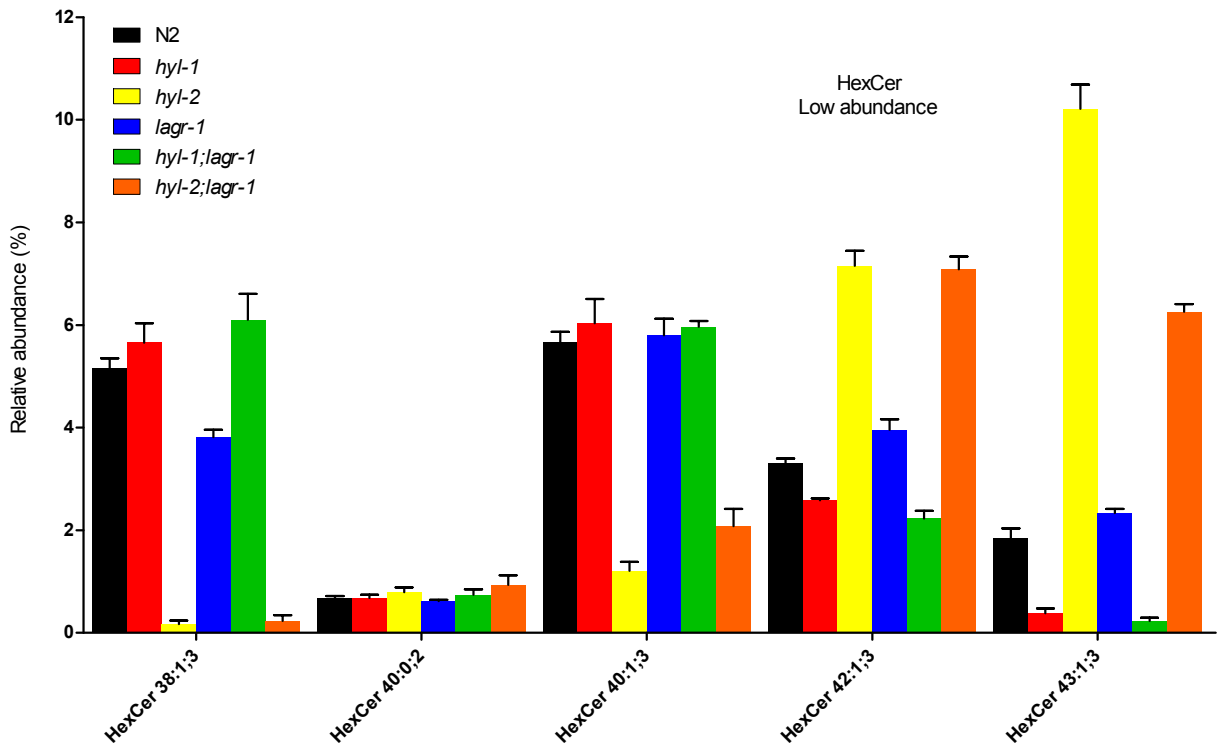

C

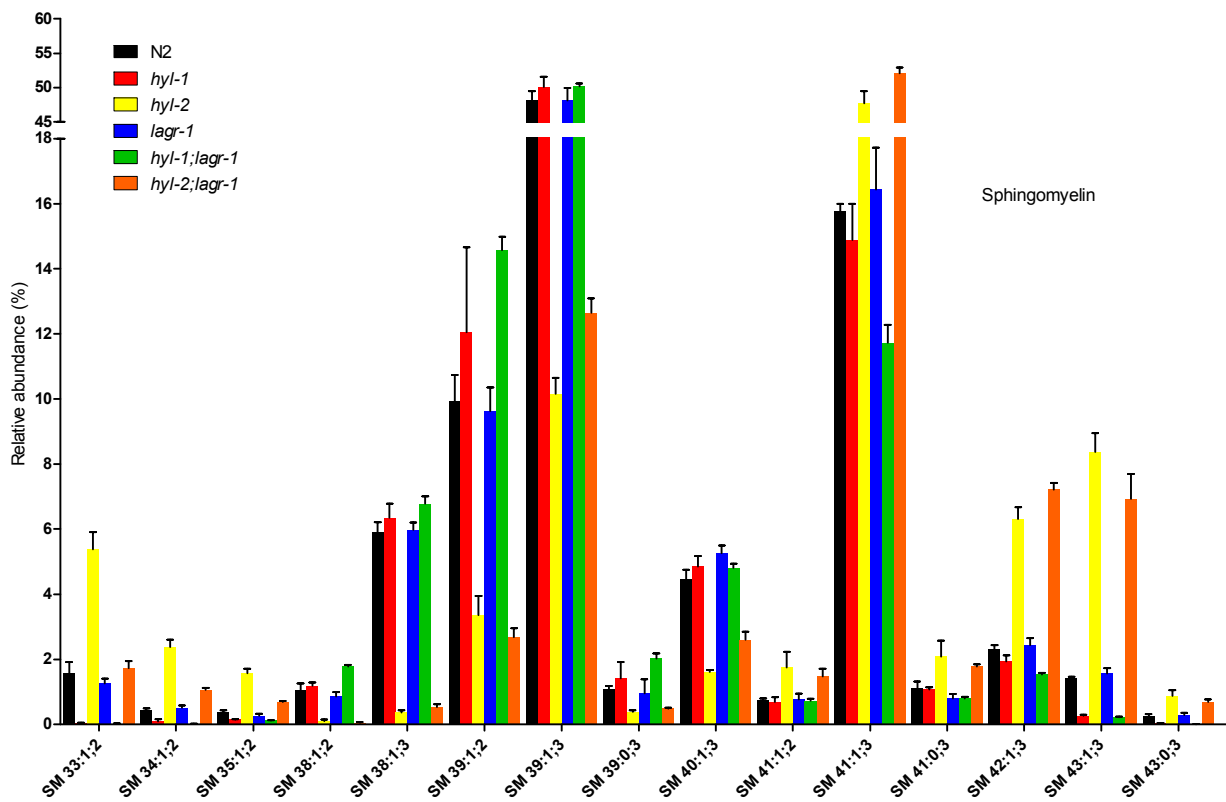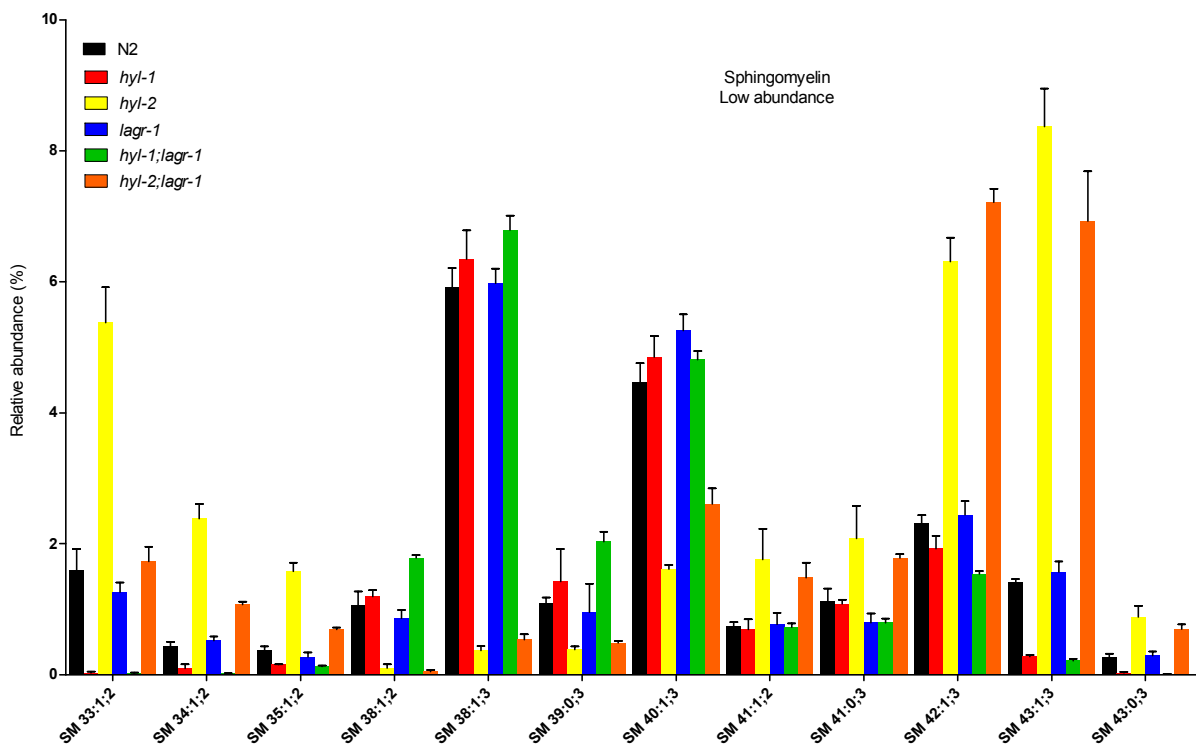

**D**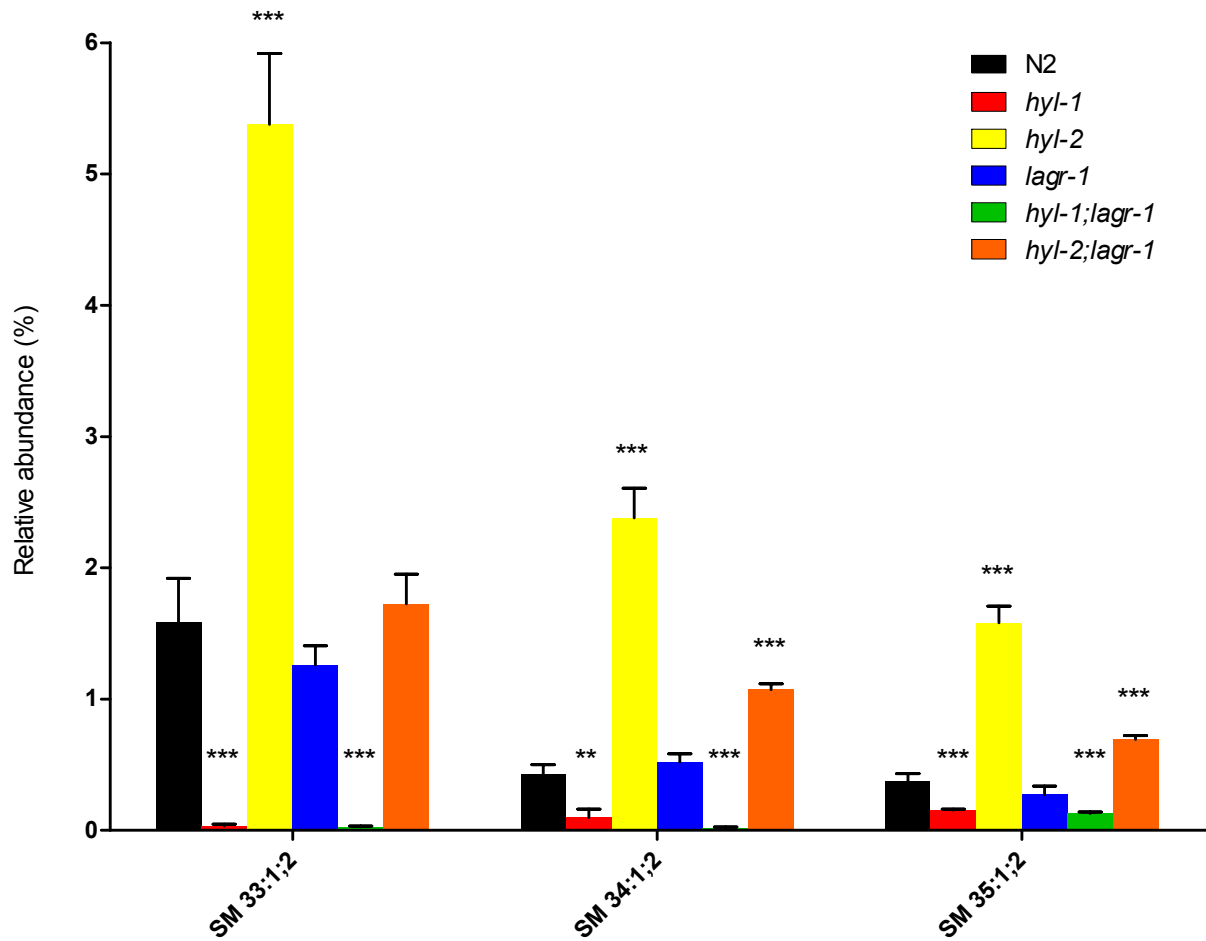

E

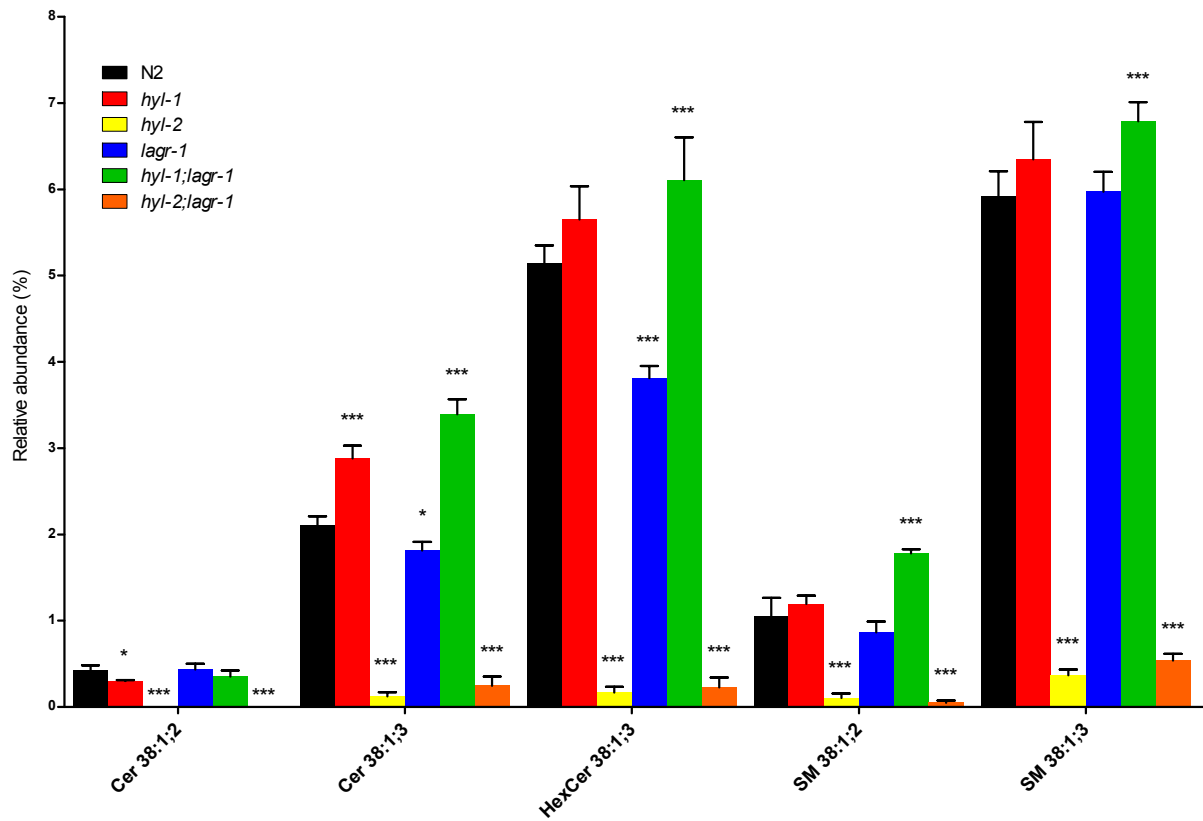

F

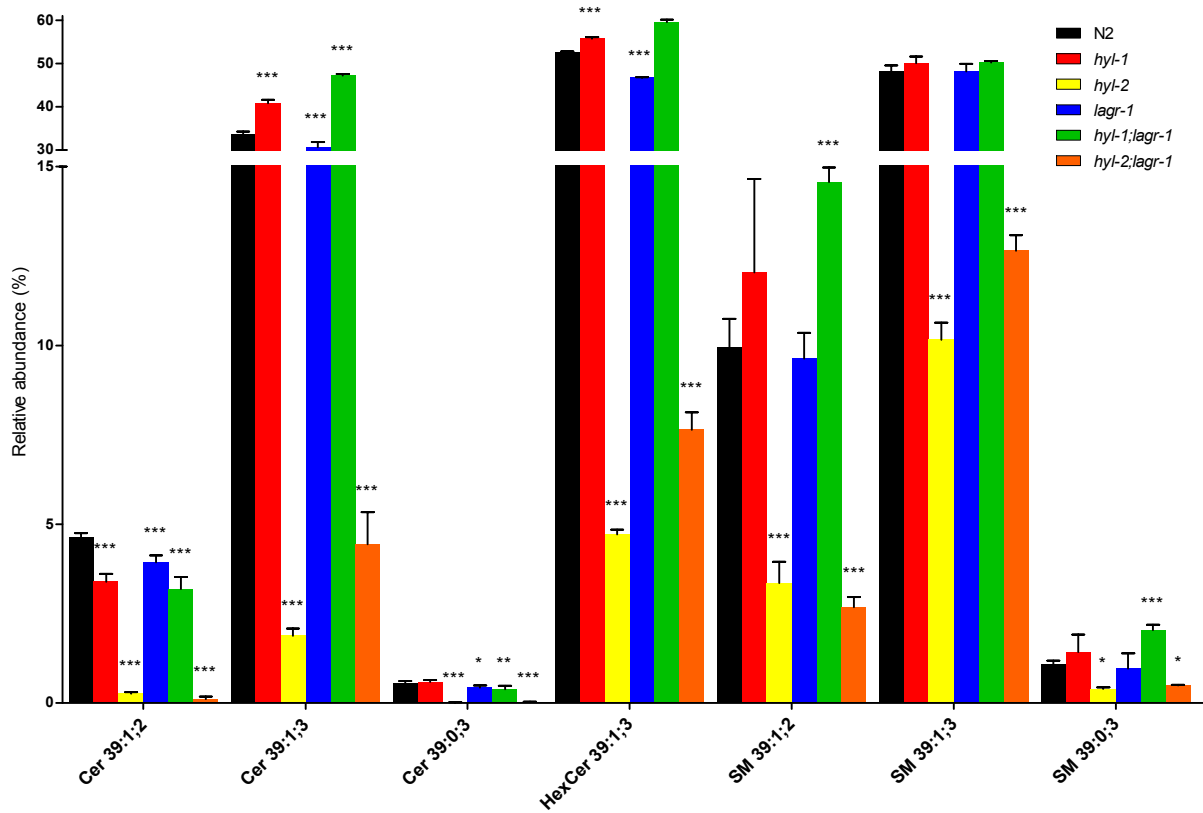

**G**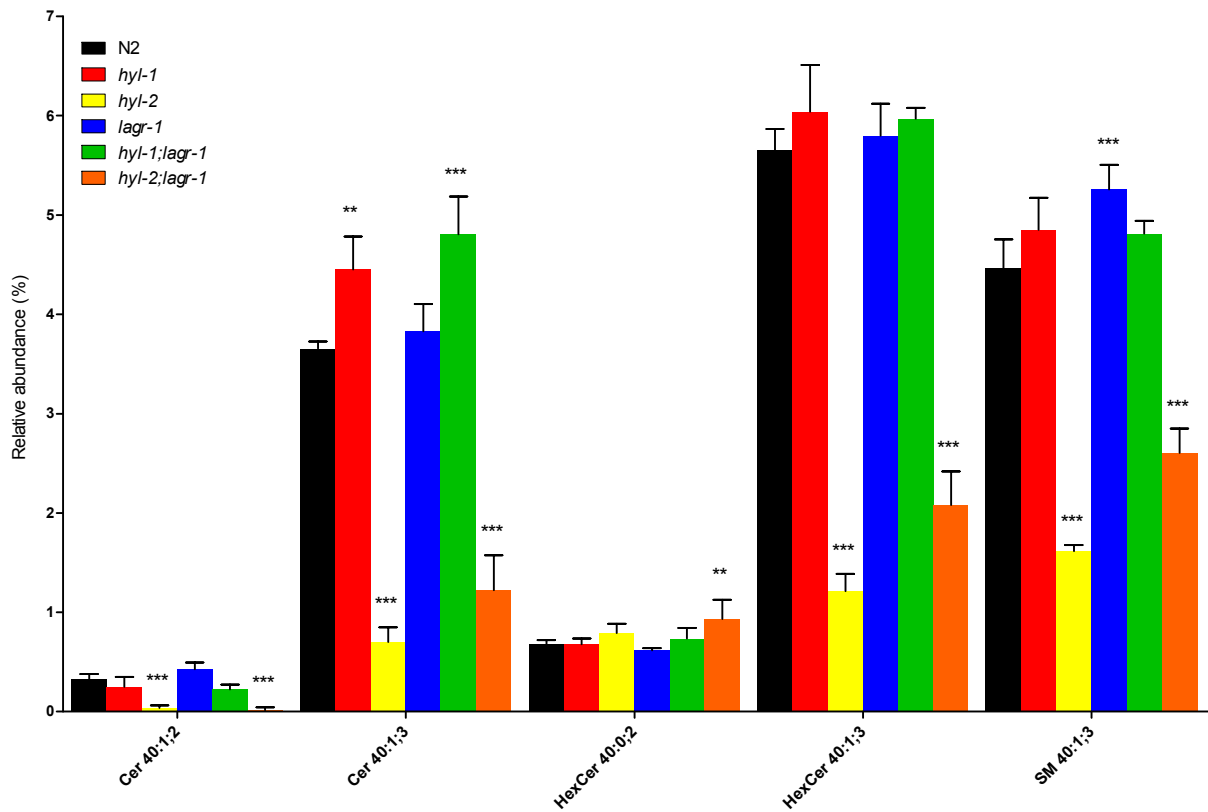

H

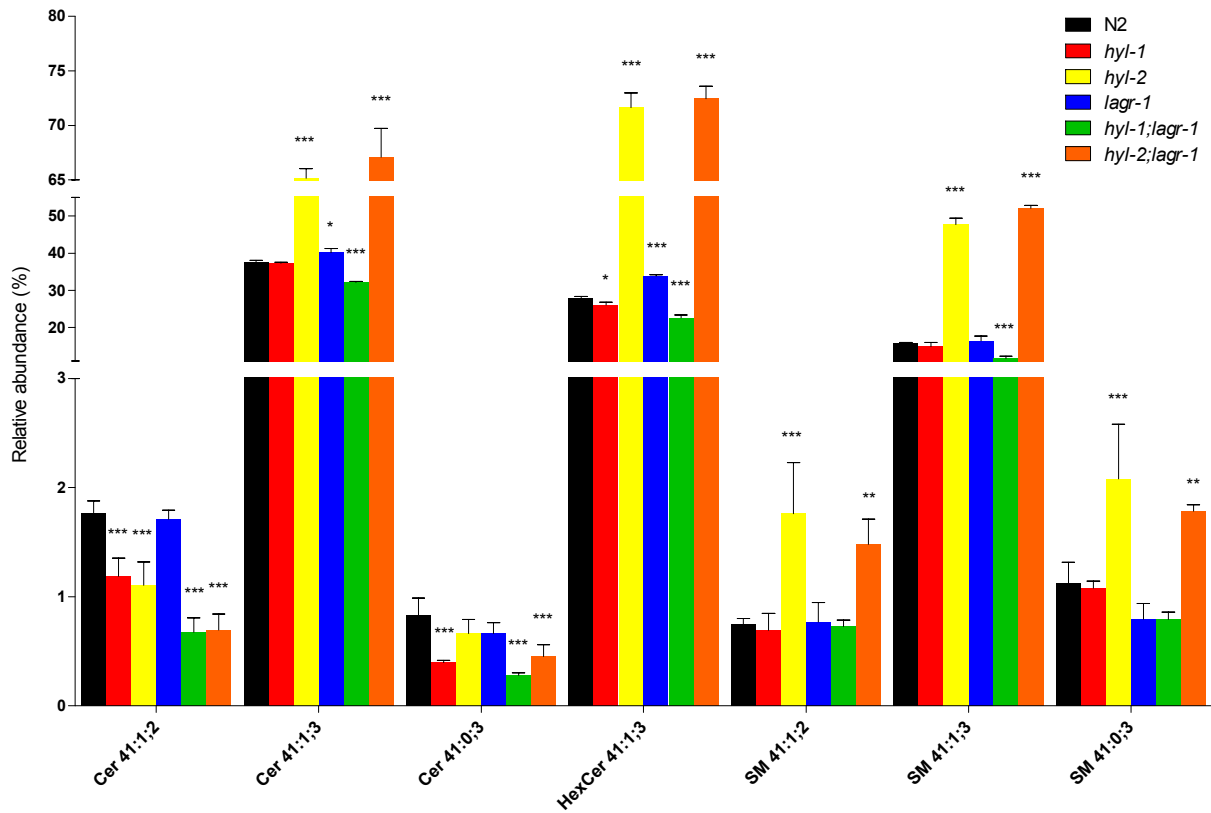



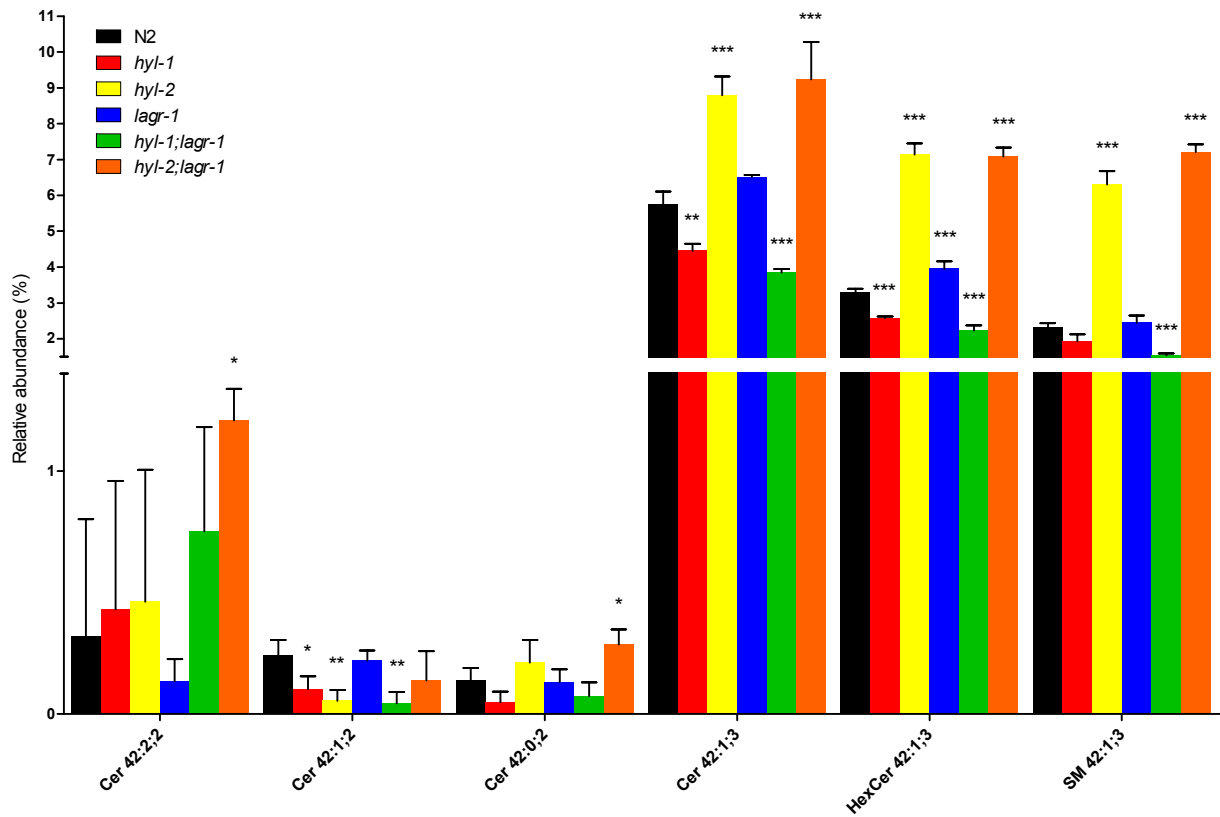

J

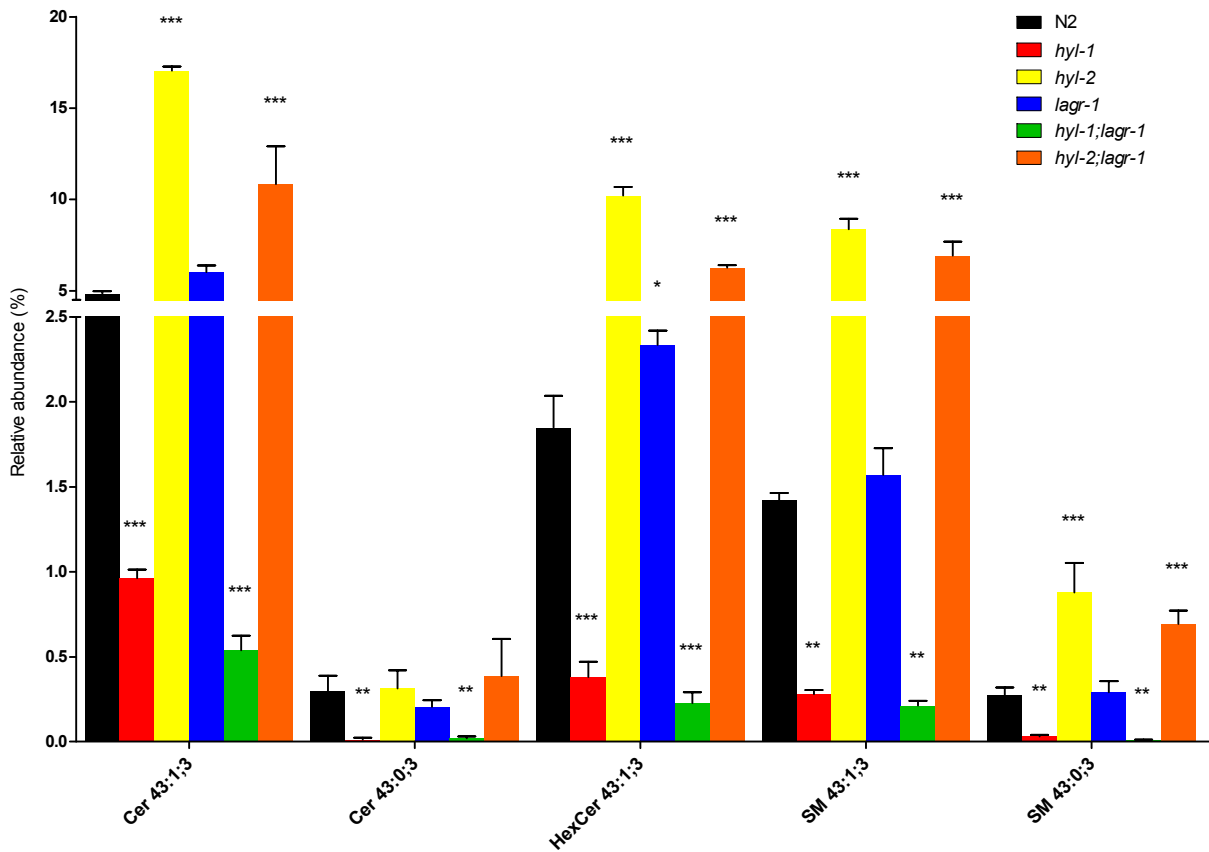

**K**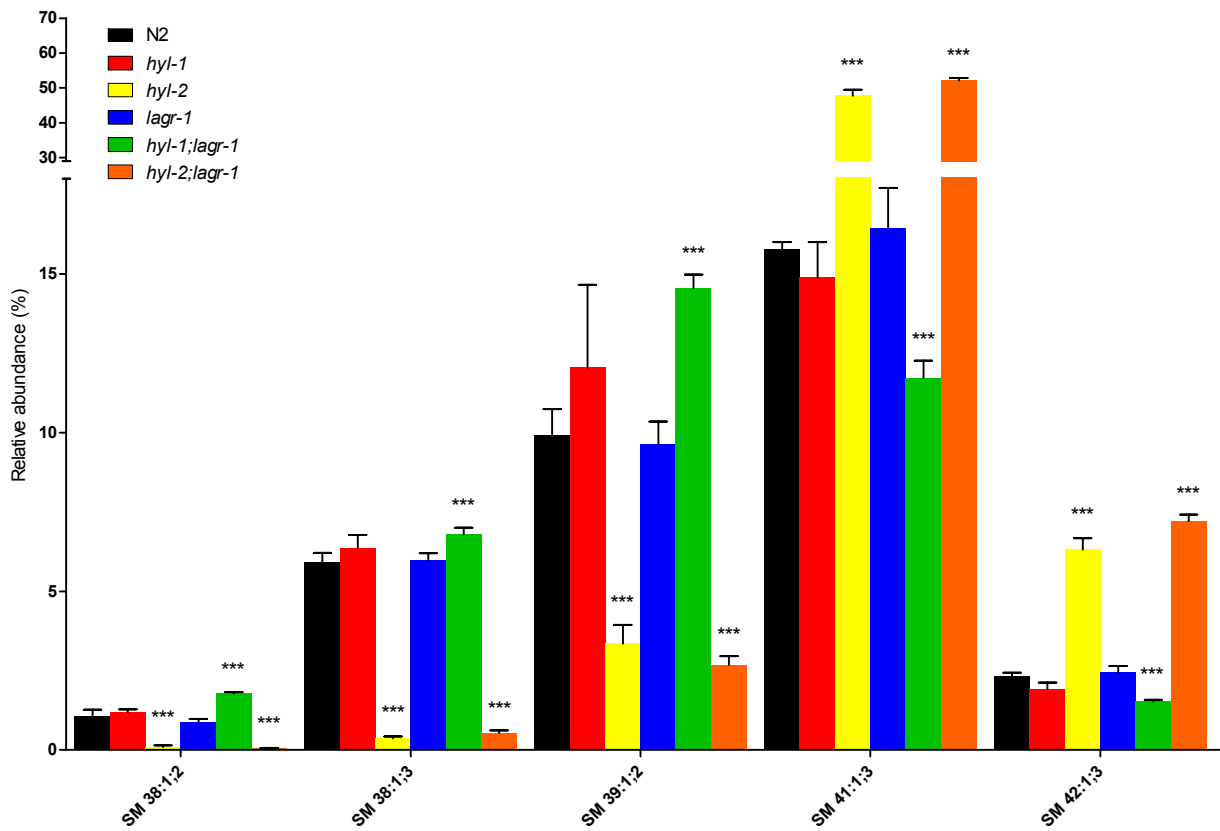

Supplement: pone.0070087.s008.pdf [file pone.0070087.s008.pdf]
