# Supplementary material for: Functional Loss of Two Ceramide Synthases Elicits Autophagy-Dependent Lifespan Extension in C. elegans
Source: PubMed Central journal article supplement (PMC3716707; doi:10.1371/journal.pone.0070087), 2013-07-19

**A** *pHYL-1::GFP fusion*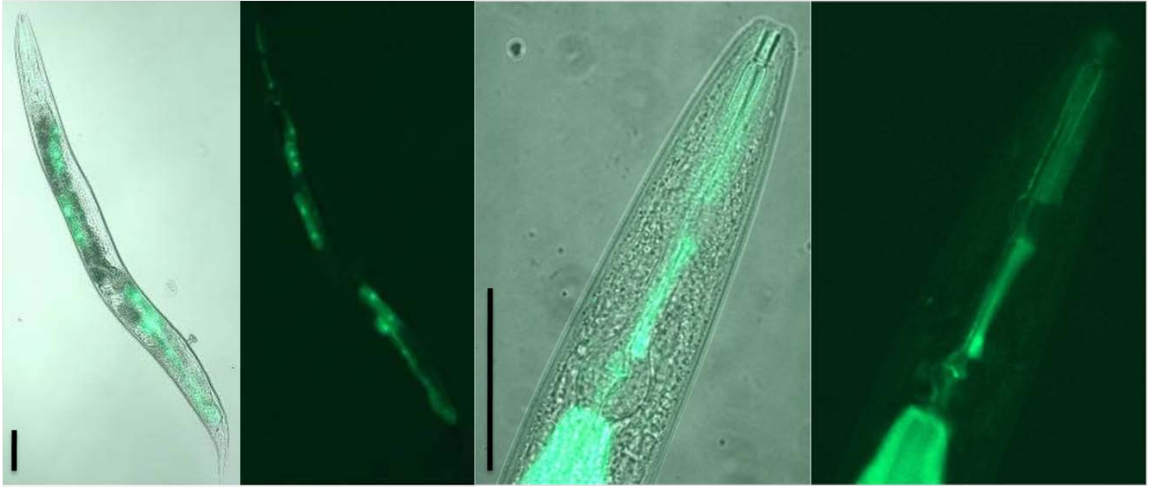**B** *HYL-2::GFP fusion*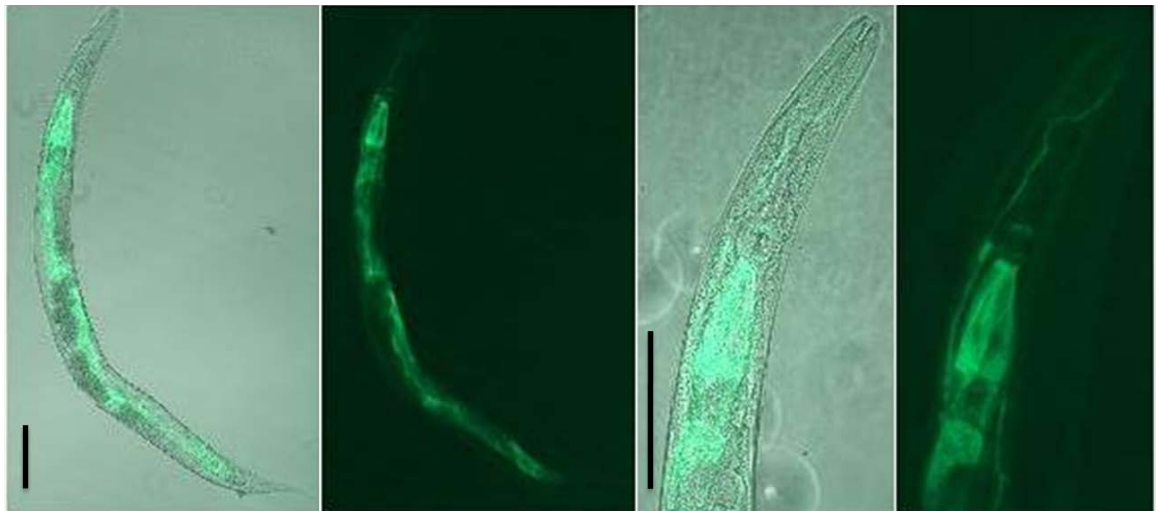**C** *pLAGR-1::GFP fusion*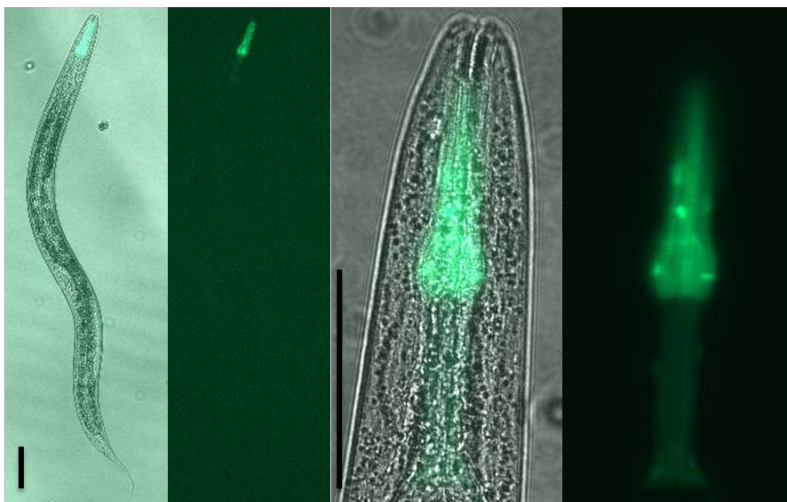

Supplement: pone.0070087.s010.pdf [file pone.0070087.s010.pdf]
