# Supplementary material for: Functional Loss of Two Ceramide Synthases Elicits Autophagy-Dependent Lifespan Extension in C. elegans
Source: PLoS One. 2013 Jul 19;8(7):e70087. doi: 10.1371/journal.pone.0070087 (PMC3716707; doi:10.1371/journal.pone.0070087)
Supplement: Table S1 — P-values from the t-test of hyl-1 and hyl-1;lagr-1 of the Principal Component Analysis. (XLSX) [file pone.0070087.s011.xlsx]

## Sheet: All
Row	Index	Peak Name	m/z	Ret. Time	Group	Use	t-value	p-value	Mean 1	Mean 2	Median 1	Median 2	Sigma 1	Sigma 2	Delta	Fold Change	Log (Fold Change)
1	62	Cer 41:0;3	N/A	N/A		TRUE	7.21946	0.00036	452	249.025	448.15	255.7	48.3258	28.7477	202.975	1.81508	0.258895
2	67	Cer 43:1;3	N/A	N/A		TRUE	7.2116	0.00036	1098.62	489.625	1129.55	465.5	72.5613	152.513	609	2.24381	0.350986
3	27	Cer 41:1;2	N/A	N/A		TRUE	6.72099	0.00053	1345.95	613.95	1309.1	644.95	105.739	190.439	732	2.19228	0.340896
4	70	SM 32:1;2	N/A	N/A		TRUE	6.22632	0.00079	192.15	41.975	182.4	47.1	33.3864	34.8185	150.175	4.57772	0.66065
5	69	SM 32:2;2	N/A	N/A		TRUE	5.35594	0.00173	749.4	480.375	757.25	484.95	77.0962	64.4058	269.025	1.56003	0.193133
6	105	SM 38:1;2	N/A	N/A		TRUE	-5.26931	0.00188	4835.48	7066.95	4829.6	7154.25	463.973	708.583	-2231.47	0.684238	-0.164793
7	127	SM 41:0;3	N/A	N/A		TRUE	5.07843	0.00227	4363.77	3137.6	4257.1	3160.2	368.06	312.602	1226.17	1.3908	0.143265
8	155	HexCer 34:0;3	N/A	N/A		TRUE	5.0802	0.00227	40.875	0	42.5	0	16.0919	0	40.875	INF	INF
9	92	SM 36:2;2	N/A	N/A		TRUE	4.91518	0.00267	263.075	110.525	255.35	101.2	45.5512	42.168	152.55	2.38023	0.376619
10	91	SM 35:0;3	N/A	N/A		TRUE	4.8711	0.00279	592.05	382.175	586.15	394.25	38.3117	77.1865	209.875	1.54916	0.190096
11	48	Cer 37:2;3	N/A	N/A		TRUE	4.83227	0.0029	177.05	55.8	171.65	59.95	35.5007	35.4695	121.25	3.17294	0.501462
12	130	SM 42:0;2	N/A	N/A		TRUE	4.6295	0.00358	597	366.05	624.95	373	78.652	61.3884	230.95	1.63092	0.212434
13	138	SM 43:0;3	N/A	N/A		TRUE	4.36855	0.00473	126.175	34.65	127.55	35.6	39.1587	14.9116	91.525	3.64141	0.56127
14	252	Hex2Cer 39:1;2	N/A	N/A		TRUE	4.35498	0.0048	4.35	0.75	4.45	0.5	1.34784	0.957427	3.6	5.8	0.763428
15	61	Cer 41:1;3	N/A	N/A		TRUE	4.31084	0.00503	42651.2	28784.5	43190.8	28280.9	4588.29	4509.59	13866.7	1.48174	0.170773
16	64	Cer 42:1;3	N/A	N/A		TRUE	4.29527	0.00512	5097.6	3443.5	5009.55	3440	571.648	516.161	1654.1	1.48035	0.170366
17	56	Cer 39:0;3	N/A	N/A		TRUE	4.03844	0.00681	668	347.475	688.3	378.05	107.239	117.035	320.525	1.92244	0.283853
18	54	Cer 39:2;3	N/A	N/A		TRUE	3.80033	0.00896	518.125	272.675	539.15	295.2	62.7036	112.933	245.45	1.90016	0.278789
19	87	SM 35:1;2	N/A	N/A		TRUE	3.58403	0.01159	610.475	500.65	605.6	524.45	26.5437	55.2393	109.825	1.21936	0.0861337
20	161	HexCer 35:0;3	N/A	N/A		TRUE	3.38912	0.01469	301.8	65.6	292.25	65.65	130.713	48.4034	236.2	4.60061	0.662815
21	240	Hex2Cer 37:1;2	N/A	N/A		TRUE	3.37951	0.01487	27.075	9.125	27.05	7.6	8.63959	6.18082	17.95	2.96712	0.472336
22	247	Hex2Cer 38:0;2	N/A	N/A		TRUE	3.30365	0.01633	10.45	3.825	11.15	4.45	2.82902	2.84297	6.625	2.73203	0.436485
23	104	SM 38:2;2	N/A	N/A		TRUE	3.29801	0.01645	39.525	6.45	39.65	0	15.3589	12.9	33.075	6.12791	0.787312
24	137	SM 43:1;3	N/A	N/A		TRUE	3.27228	0.01699	1132.95	846.375	1136.65	892.15	128.656	118.854	286.575	1.33859	0.126648
25	196	HexCer 41:1;3	N/A	N/A		TRUE	3.24522	0.01757	56369.3	31803.5	57956.7	31424.8	14474.7	4437.91	24565.8	1.77243	0.248568
26	90	SM 35:1;3	N/A	N/A		TRUE	3.24487	0.01758	375.475	250.7	364.75	247.95	61.6772	45.9399	124.775	1.49771	0.175427
27	193	HexCer 41:1;2	N/A	N/A		TRUE	3.22647	0.01799	134.85	30.925	138.5	28.5	57.6192	28.8095	103.925	4.36055	0.639541
28	126	SM 41:1;3	N/A	N/A		TRUE	3.12667	0.02041	60255.6	46687.4	60327.6	47219.1	5424.95	6774.52	13568.1	1.29062	0.110797
29	25	Cer 40:0;2	N/A	N/A		TRUE	3.10388	0.02101	291.35	156.975	287.2	142.2	53.7138	67.9104	134.375	1.85603	0.268585
30	11	Cer 35:1;2	N/A	N/A		TRUE	3.04101	0.02277	100.725	47.225	102.05	43.5	29.7202	18.8346	53.5	2.13287	0.328965
31	132	SM 42:1;3	N/A	N/A		TRUE	3.00681	0.0238	7803.9	6094.32	7808.8	6037.85	950.771	623.788	1709.58	1.28052	0.107386
32	86	SM 35:2;2	N/A	N/A		TRUE	2.99287	0.02423	164.4	84.475	154.05	79.45	43.477	31.0227	79.925	1.94614	0.289174
33	201	HexCer 42:1;3	N/A	N/A		TRUE	2.96261	0.0252	5625.45	3128.55	5659.15	3097.15	1620.37	464.393	2496.9	1.7981	0.254814
34	4	Cer 33:2;2	N/A	N/A		TRUE	2.90232	0.02725	78.175	20.025	65.75	26.05	37.7408	13.4666	58.15	3.90387	0.591495
35	207	HexCer 43:1;3	N/A	N/A		TRUE	2.83522	0.02975	862.3	314.9	904.35	327.2	377.429	81.5698	547.4	2.73833	0.437486
36	135	SM 43:0;2	N/A	N/A		TRUE	2.77051	0.0324	17.625	0	20.05	0	12.7233	0	17.625	INF	INF
37	112	SM 39:0;2	N/A	N/A		TRUE	-2.76783	0.03252	1032.97	1475.67	1057.95	1444.9	236.254	215.67	-442.7	0.700002	-0.154901
38	10	Cer 35:2;2	N/A	N/A		TRUE	2.74516	0.03351	98.6	31.35	90.2	19.1	26.2668	41.3594	67.25	3.14514	0.497639
39	160	HexCer 35:1;3	N/A	N/A		TRUE	2.71472	0.03489	147.35	39.325	150.75	41.95	73.5717	30.3466	108.025	3.74698	0.573681
40	189	HexCer 40:2;3	N/A	N/A		TRUE	2.70974	0.03512	1103.47	413.75	1088.3	441.9	498.472	103.338	689.725	2.66701	0.426024
41	211	Hex2Cer 32:0;2	N/A	N/A		TRUE	2.70734	0.03523	326.925	257.425	338.65	256.25	49.5456	13.4621	69.5	1.26998	0.103797
42	166	HexCer 36:1;3	N/A	N/A		TRUE	2.63854	0.03862	25.5	0	30.05	0	19.3289	0	25.5	INF	INF
43	172	HexCer 37:1;3	N/A	N/A		TRUE	2.58393	0.04155	1347.8	699.325	1297.45	705.3	492.135	98.6738	648.475	1.92729	0.284946
44	251	Hex2Cer 39:2;2	N/A	N/A		TRUE	-2.57923	0.04181	0.225	2.325	0	2.95	0.45	1.56498	-2.1	0.0967742	-1.01424
45	233	Hex2Cer 36:2;2	N/A	N/A		TRUE	2.56387	0.04269	3.3	0	3.7	0	2.57423	0	3.3	INF	INF
46	218	Hex2Cer 33:2;3	N/A	N/A		TRUE	2.54557	0.04375	11.55	4.975	9.15	4.7	5.10849	0.767572	6.575	2.32161	0.365789
47	235	Hex2Cer 36:0;2	N/A	N/A		TRUE	2.51008	0.0459	7.45	2.525	6.5	1.5	2.18861	3.25717	4.925	2.9505	0.469895
48	206	HexCer 43:2;3	N/A	N/A		TRUE	-2.49415	0.0469	18.6	55.075	24.3	56	12.4419	26.4702	-36.475	0.337721	-0.471442
49	2	Cer 32:1;2	N/A	N/A		TRUE	2.46879	0.04854	23.55	0	24.3	0	19.0782	0	23.55	INF	INF
50	81	SM 34:1;2	N/A	N/A		TRUE	2.44906	0.04985	401.55	64.1	376.05	64.9	273.719	31.9268	337.45	6.26443	0.796882
51	225	Hex2Cer 34:1;3	N/A	N/A		TRUE	2.4102	0.05256	4.175	1.4	4	1.55	2.03695	1.07393	2.775	2.98214	0.474528
52	102	SM 37:1;3	N/A	N/A		TRUE	2.36098	0.05621	3206.85	2889.8	3238.3	2831.5	189.538	190.283	317.05	1.10971	0.0452109
53	173	HexCer 37:0;3	N/A	N/A		TRUE	2.35196	0.05691	194.625	98.275	204	97.15	33.5861	74.7315	96.35	1.98041	0.296756
54	255	Hex2Cer 39:1;3	N/A	N/A		TRUE	2.33308	0.05839	72.45	10.975	75.6	8.6	51.88	9.25252	61.475	6.60137	0.819634
55	205	HexCer 43:0;2	N/A	N/A		TRUE	2.29119	0.06184	9.625	0	10.6	0	8.40174	0	9.625	INF	INF
56	117	SM 40:1;2	N/A	N/A		TRUE	-2.28326	0.06252	1537.62	2215.3	1565.95	2321.05	247.509	539.542	-677.675	0.694093	-0.158582
57	22	Cer 39:1;2	N/A	N/A		TRUE	2.25596	0.06491	3879.2	2884.1	3922	2833.9	495.639	729.801	995.1	1.34503	0.128732
58	115	SM 39:0;3	N/A	N/A		TRUE	-2.21109	0.06904	5730.73	8035.1	4904.8	7726.85	1921.42	807.943	-2304.38	0.713211	-0.146782
59	184	HexCer 39:1;3	N/A	N/A		TRUE	2.18905	0.07117	121300	83419.9	123387	83232.3	33612.9	8241.38	37879.8	1.45409	0.16259
60	103	SM 37:0;3	N/A	N/A		TRUE	2.14568	0.07556	591.8	426.5	573.8	437.95	132.993	77.799	165.3	1.38757	0.142256
61	197	HexCer 41:0;3	N/A	N/A		TRUE	2.13371	0.07681	449.875	155.925	442.2	154.1	270.93	50.1339	293.95	2.8852	0.460176
62	190	HexCer 40:1;3	N/A	N/A		TRUE	2.09982	0.0805	13383.5	8358.58	13647	8221.75	4704.84	878.138	5024.95	1.60117	0.204438
63	221	Hex2Cer 34:2;2	N/A	N/A		TRUE	2.07516	0.08329	4.325	1.125	5.35	1.2	2.95677	0.877021	3.2	3.84444	0.584834
64	30	Cer 42:1;2	N/A	N/A		TRUE	2.02622	0.08913	115.4	42.5	110	27.95	51.7822	49.9635	72.9	2.71529	0.433817
65	214	Hex2Cer 32:0;3	N/A	N/A		TRUE	2.0149	0.09054	25	15.5	24.4	16.05	5.03918	7.97036	9.5	1.6129	0.207608
66	187	HexCer 40:1;2	N/A	N/A		TRUE	2.00602	0.09166	16.55	3.425	20.95	0	11.1494	6.85	13.125	4.83212	0.684137
67	224	Hex2Cer 34:2;3	N/A	N/A		TRUE	1.98431	0.09446	13.475	7.925	13.7	7	2.19754	5.14417	5.55	1.70032	0.23053
68	96	SM 36:1;3	N/A	N/A		TRUE	1.97797	0.09529	134.725	84.325	134.6	72.85	38.9605	32.8501	50.4	1.59769	0.203492
69	124	SM 41:0;2	N/A	N/A		TRUE	1.95329	0.09861	481.675	299.05	530.5	297.25	179.483	52.4595	182.625	1.61068	0.20701
70	181	HexCer 39:1;2	N/A	N/A		TRUE	1.90906	0.10485	212.9	78.25	216.15	65.05	133.197	46.4516	134.65	2.72077	0.434691
71	178	HexCer 38:1;3	N/A	N/A		TRUE	1.87927	0.10927	12472.5	8499.25	12419.2	8599.95	4216.86	312.954	3973.2	1.46748	0.166571
72	263	Hex2Cer 41:2;2	N/A	N/A		TRUE	-1.84147	0.11514	2.175	4.425	2.6	4.8	1.68003	1.77459	-2.25	0.491525	-0.308454
73	188	HexCer 40:0;2	N/A	N/A		TRUE	1.83798	0.1157	1483.65	1031.9	1453.25	1087.55	462.83	165.626	451.75	1.43778	0.157694
74	183	HexCer 39:2;3	N/A	N/A		TRUE	1.77546	0.12617	95.075	54.125	98.3	66.1	27.3685	37.1328	40.95	1.75658	0.244668
75	45	Cer 35:0;3	N/A	N/A		TRUE	-1.76749	0.12757	4.7	18.45	0	23.6	9.4	12.3983	-13.75	0.254743	-0.593899
76	168	HexCer 37:2;2	N/A	N/A		TRUE	1.76104	0.12871	102.975	54.3	87.5	60.2	41.4489	36.5767	48.675	1.89641	0.277932
77	267	Hex2Cer 41:1;3	N/A	N/A		TRUE	1.75986	0.12892	10.175	2.45	10.6	1.3	8.09583	3.39559	7.725	4.15306	0.618368
78	146	HexCer 33:1;2	N/A	N/A		TRUE	-1.73452	0.13352	3.4	13.125	0	16.75	6.8	8.91642	-9.725	0.259048	-0.58662
79	270	Hex2Cer 42:1;2	N/A	N/A		TRUE	1.73152	0.13407	1.425	0	1.4	0	1.64595	0	1.425	INF	INF
80	131	SM 42:2;3	N/A	N/A		TRUE	1.7302	0.13432	15.3	0	14.8	0	17.6858	0	15.3	INF	INF
81	249	Hex2Cer 38:1;3	N/A	N/A		TRUE	1.72837	0.13466	1.625	0	1.55	0	1.88038	0	1.625	INF	INF
82	144	HexCer 32:0;3	N/A	N/A		TRUE	1.72423	0.13543	8.9	0	8.3	0	10.3234	0	8.9	INF	INF
83	273	Hex2Cer 42:1;3	N/A	N/A		TRUE	1.71703	0.13679	1.6	0	1.45	0	1.86369	0	1.6	INF	INF
84	162	HexCer 36:2;2	N/A	N/A		TRUE	1.71027	0.13807	10.6	0	9.4	0	12.3957	0	10.6	INF	INF
85	186	HexCer 40:2;2	N/A	N/A		TRUE	1.69775	0.14048	7.7	0	6.6	0	9.07083	0	7.7	INF	INF
86	199	HexCer 42:0;2	N/A	N/A		TRUE	1.69225	0.14154	379.225	181.925	380.95	179.15	230.357	36.1719	197.3	2.08451	0.319005
87	63	Cer 42:2;3	N/A	N/A		TRUE	-1.65697	0.1486	0	18.35	0	14.4	0	22.1488	-18.35	0	#NAME?
88	222	Hex2Cer 34:1;2	N/A	N/A		TRUE	1.65316	0.14938	13.4	7.7	13.5	7.6	6.20699	3.00444	5.7	1.74026	0.240614
89	58	Cer 40:1;3	N/A	N/A		TRUE	1.63811	0.15251	5109.3	4288.4	5018.85	4459.6	794.919	610.421	820.9	1.19142	0.0760661
90	274	Hex2Cer 42:0;3	N/A	N/A		TRUE	-1.6299	0.15424	0	1.475	0	1.1	0	1.80993	-1.475	0	#NAME?
91	111	SM 39:1;2	N/A	N/A		TRUE	-1.62862	0.15452	48642	57691	49795.7	58379.7	10027.9	4788.26	-9048.95	0.843148	-0.0740962
92	164	HexCer 36:0;2	N/A	N/A		TRUE	1.62495	0.1553	20.025	0	14.8	0	24.6469	0	20.025	INF	INF
93	256	Hex2Cer 39:0;3	N/A	N/A		TRUE	1.60944	0.15865	2.1	0.55	2.35	0	1.58114	1.1	1.55	3.81818	0.581857
94	226	Hex2Cer 34:0;3	N/A	N/A		TRUE	1.58548	0.16395	3.525	0.675	3.05	0	3.33204	1.35	2.85	5.22222	0.717855
95	167	HexCer 36:0;3	N/A	N/A		TRUE	1.5756	0.16619	6.35	0	4.3	0	8.0604	0	6.35	INF	INF
96	113	SM 39:2;3	N/A	N/A		TRUE	1.56114	0.16951	649.725	542.625	660.25	567.95	85.5844	107.244	107.1	1.19737	0.0782298
97	8	Cer 34:1;2	N/A	N/A		TRUE	1.5609	0.16957	22.2	0	14.65	0	28.4452	0	22.2	INF	INF
98	169	HexCer 37:1;2	N/A	N/A		TRUE	-1.55962	0.16987	5.875	15.825	7	12.45	4.22562	12.0395	-9.95	0.371248	-0.430336
99	133	SM 42:0;3	N/A	N/A		TRUE	1.54647	0.17295	367.925	276.475	342.65	254.55	80.091	87.0231	91.45	1.33077	0.124103
100	93	SM 36:1;2	N/A	N/A		TRUE	-1.51429	0.18073	228.575	302.475	268.5	303.3	86.5265	45.1621	-73.9	0.755682	-0.121661
101	139	HexCer 32:2;2	N/A	N/A		TRUE	1.4921	0.18627	11.575	3.65	15.4	0	7.71681	7.3	7.925	3.17123	0.501228
102	80	SM 34:2;2	N/A	N/A		TRUE	1.45591	0.19567	1206.17	964.85	1134.2	1008.7	296.258	148.765	241.325	1.25012	0.0969505
103	209	Hex2Cer 32:2;2	N/A	N/A		TRUE	1.4449	0.19861	2141.47	1954.03	2206.05	1924.5	170.256	195.792	187.45	1.09593	0.0397829
104	134	SM 43:1;2	N/A	N/A		TRUE	1.42772	0.20329	44.725	23.75	41.6	23.5	10.5396	27.4272	20.975	1.88316	0.274887
105	59	Cer 40:0;3	N/A	N/A		TRUE	-1.42113	0.20511	31.85	58.775	28	61.6	29.4864	23.7988	-26.925	0.541897	-0.266083
106	99	SM 37:1;2	N/A	N/A		TRUE	-1.41433	0.207	780.85	957.875	769.65	1002.4	164.036	189.097	-177.025	0.81519	-0.0887412
107	5	Cer 33:1;2	N/A	N/A		TRUE	1.40577	0.20941	60.9	30.475	72.55	30.45	43.0846	4.16923	30.425	1.99836	0.300674
108	238	Hex2Cer 36:0;3	N/A	N/A		TRUE	-1.36049	0.22256	0.65	1.9	0	2.35	1.3	1.29872	-1.25	0.342105	-0.46584
109	228	Hex2Cer 35:1;2	N/A	N/A		TRUE	1.31648	0.23606	36.225	26.95	36.3	23.7	10.6569	9.21828	9.275	1.34416	0.12845
110	191	HexCer 40:0;3	N/A	N/A		TRUE	1.30123	0.24091	96.6	73.675	105.05	72.95	26.1757	23.5883	22.925	1.31116	0.117657
111	125	SM 41:2;3	N/A	N/A		TRUE	-1.28123	0.2474	138.15	199.05	148.5	179.45	25.5229	91.5748	-60.9	0.694047	-0.158611
112	154	HexCer 34:1;3	N/A	N/A		TRUE	1.26536	0.25266	28.025	9.775	26.2	5.35	25.5432	13.4021	18.25	2.86701	0.457429
113	118	SM 40:0;2	N/A	N/A		TRUE	1.25873	0.25489	2352.65	2196.68	2409.5	2246.9	161.833	187.695	155.975	1.07101	0.0297915
114	116	SM 40:2;2	N/A	N/A		TRUE	1.23603	0.26264	28.6	8.25	22.65	7.5	31.4961	9.60469	20.35	3.46667	0.539912
115	101	SM 37:2;3	N/A	N/A		TRUE	1.23066	0.2645	220.8	147.25	194.7	157.2	110.397	45.8248	73.55	1.49949	0.175944
116	109	SM 38:0;3	N/A	N/A		TRUE	-1.2264	0.26599	715.025	884.525	707.55	918.8	255.048	106.577	-169.5	0.808372	-0.0923889
117	219	Hex2Cer 33:1;3	N/A	N/A		TRUE	1.20945	0.27198	6.55	3.3	4.5	3	5.31005	0.828654	3.25	1.98485	0.297727
118	260	Hex2Cer 40:2;3	N/A	N/A		TRUE	-1.16273	0.28909	0.65	1.725	0	2.05	1.3	1.31498	-1.075	0.376812	-0.423876
119	276	Hex2Cer 43:1;2	N/A	N/A		TRUE	1.16212	0.28932	3.675	1.4	4.35	0	2.73663	2.8	2.275	2.625	0.419129
120	28	Cer 41:0;2	N/A	N/A		TRUE	1.15827	0.29077	80.65	50.675	85.25	44.9	40.9105	31.7057	29.975	1.59151	0.201811
121	79	SM 33:0;3	N/A	N/A		TRUE	1.15702	0.29124	4.475	0	0.95	0	7.73536	0	4.475	INF	INF
122	55	Cer 39:1;3	N/A	N/A		TRUE	1.13614	0.29923	46754.1	42171.9	47722.5	41334.9	5373.63	6015.68	4582.18	1.10865	0.0447963
123	180	HexCer 39:2;2	N/A	N/A		TRUE	1.1333	0.30033	41.875	25.575	39.25	19.45	10.1227	26.9256	16.3	1.63734	0.214139
124	213	Hex2Cer 32:1;3	N/A	N/A		TRUE	1.12939	0.30185	53.775	39.675	53.7	37.3	17.7462	17.565	14.1	1.35539	0.132063
125	44	Cer 35:1;3	N/A	N/A		TRUE	1.12749	0.3026	47.6	26.35	50.1	21	24.3162	28.8026	21.25	1.80645	0.256826
126	24	Cer 40:1;2	N/A	N/A		TRUE	1.12391	0.304	284.675	204.375	304.5	195.5	125.216	68.8455	80.3	1.39291	0.143922
127	33	Cer 43:1;2	N/A	N/A		TRUE	1.11287	0.30835	23.75	6.7	22.1	0	27.5562	13.4	17.05	3.54478	0.549589
128	110	SM 39:2;2	N/A	N/A		TRUE	-1.07207	0.32491	48.775	79.275	49.65	69.25	33.7526	45.8073	-30.5	0.615263	-0.210939
129	43	Cer 35:2;3	N/A	N/A		TRUE	1.0338	0.34109	10.475	3.4	7.75	0	11.8787	6.8	7.075	3.08088	0.488675
130	271	Hex2Cer 42:0;2	N/A	N/A		TRUE	1.03284	0.3415	1.875	0.5	1.15	0	2.46762	1	1.375	3.75	0.574031
131	142	HexCer 32:2;3	N/A	N/A		TRUE	-1.0205	0.34686	2.15	6.725	0	5.95	4.3	7.86781	-4.575	0.319703	-0.495254
132	269	Hex2Cer 42:2;2	N/A	N/A		TRUE	-1.01881	0.3476	0.65	2	0	2	1.3	2.3094	-1.35	0.325	-0.488117
133	88	SM 35:0;2	N/A	N/A		TRUE	1.01774	0.34807	63.225	39.45	65.8	36.6	29.9009	35.9001	23.775	1.60266	0.204842
134	140	HexCer 32:1;2	N/A	N/A		TRUE	1.00508	0.35366	29.7	11.7	19.65	13	34.7336	8.74757	18	2.53846	0.404571
135	1	Cer 32:2;2	N/A	N/A		TRUE	1	0.35592	3.7	0	0	0	7.4	0	3.7	INF	INF
136	6	Cer 33:0;2	N/A	N/A		TRUE	1	0.35592	7.225	0	0	0	14.45	0	7.225	INF	INF
137	7	Cer 34:2;2	N/A	N/A		TRUE	1	0.35592	5.3	0	0	0	10.6	0	5.3	INF	INF
138	12	Cer 36:2;2	N/A	N/A		TRUE	-1	0.35592	0	5.55	0	0	0	11.1	-5.55	0	#NAME?
139	15	Cer 37:2;2	N/A	N/A		TRUE	1	0.35592	6	0	0	0	12	0	6	INF	INF
140	26	Cer 41:2;2	N/A	N/A		TRUE	1	0.35592	5.925	0	0	0	11.85	0	5.925	INF	INF
141	35	Cer 32:1;3	N/A	N/A		TRUE	1	0.35592	11.2	0	0	0	22.4	0	11.2	INF	INF
142	36	Cer 32:0;3	N/A	N/A		TRUE	1	0.35592	6.05	0	0	0	12.1	0	6.05	INF	INF
143	37	Cer 33:2;3	N/A	N/A		TRUE	1	0.35592	6.325	0	0	0	12.65	0	6.325	INF	INF
144	38	Cer 33:1;3	N/A	N/A		TRUE	1	0.35592	3.475	0	0	0	6.95	0	3.475	INF	INF
145	39	Cer 33:0;3	N/A	N/A		TRUE	1	0.35592	5.15	0	0	0	10.3	0	5.15	INF	INF
146	42	Cer 34:0;3	N/A	N/A		TRUE	1	0.35592	5.45	0	0	0	10.9	0	5.45	INF	INF
147	66	Cer 43:2;3	N/A	N/A		TRUE	-1	0.35592	0	8.8	0	0	0	17.6	-8.8	0	#NAME?
148	85	SM 34:0;3	N/A	N/A		TRUE	1	0.35592	9.125	0	0	0	18.25	0	9.125	INF	INF
149	128	SM 42:2;2	N/A	N/A		TRUE	1	0.35592	2.925	0	0	0	5.85	0	2.925	INF	INF
150	141	HexCer 32:0;2	N/A	N/A		TRUE	1	0.35592	4.975	0	0	0	9.95	0	4.975	INF	INF
151	143	HexCer 32:1;3	N/A	N/A		TRUE	-1	0.35592	0	2.95	0	0	0	5.9	-2.95	0	#NAME?
152	145	HexCer 33:2;2	N/A	N/A		TRUE	1	0.35592	3.275	0	0	0	6.55	0	3.275	INF	INF
153	147	HexCer 33:0;2	N/A	N/A		TRUE	-1	0.35592	0	4.45	0	0	0	8.9	-4.45	0	#NAME?
154	151	HexCer 34:1;2	N/A	N/A		TRUE	1	0.35592	2.925	0	0	0	5.85	0	2.925	INF	INF
155	152	HexCer 34:0;2	N/A	N/A		TRUE	-1	0.35592	0	3.125	0	0	0	6.25	-3.125	0	#NAME?
156	157	HexCer 35:1;2	N/A	N/A		TRUE	-1	0.35592	0	4.875	0	0	0	9.75	-4.875	0	#NAME?
157	159	HexCer 35:2;3	N/A	N/A		TRUE	-1	0.35592	0	1.675	0	0	0	3.35	-1.675	0	#NAME?
158	163	HexCer 36:1;2	N/A	N/A		TRUE	1	0.35592	1.925	0	0	0	3.85	0	1.925	INF	INF
159	165	HexCer 36:2;3	N/A	N/A		TRUE	-1	0.35592	0	2.425	0	0	0	4.85	-2.425	0	#NAME?
160	192	HexCer 41:2;2	N/A	N/A		TRUE	1	0.35592	3.65	0	0	0	7.3	0	3.65	INF	INF
161	200	HexCer 42:2;3	N/A	N/A		TRUE	-1	0.35592	0	4.125	0	0	0	8.25	-4.125	0	#NAME?
162	204	HexCer 43:1;2	N/A	N/A		TRUE	1	0.35592	1.2	0	0	0	2.4	0	1.2	INF	INF
163	208	HexCer 43:0;3	N/A	N/A		TRUE	-1	0.35592	0	2.85	0	0	0	5.7	-2.85	0	#NAME?
164	242	Hex2Cer 37:2;3	N/A	N/A		TRUE	1	0.35592	1.65	0	0	0	3.3	0	1.65	INF	INF
165	243	Hex2Cer 37:1;3	N/A	N/A		TRUE	1	0.35592	0.775	0	0	0	1.55	0	0.775	INF	INF
166	244	Hex2Cer 37:0;3	N/A	N/A		TRUE	1	0.35592	0.475	0	0	0	0.95	0	0.475	INF	INF
167	250	Hex2Cer 38:0;3	N/A	N/A		TRUE	-1	0.35592	0	0.725	0	0	0	1.45	-0.725	0	#NAME?
168	257	Hex2Cer 40:2;2	N/A	N/A		TRUE	1	0.35592	0.625	0	0	0	1.25	0	0.625	INF	INF
169	264	Hex2Cer 41:1;2	N/A	N/A		TRUE	-1	0.35592	0	0.575	0	0	0	1.15	-0.575	0	#NAME?
170	265	Hex2Cer 41:0;2	N/A	N/A		TRUE	-1	0.35592	0	0.7	0	0	0	1.4	-0.7	0	#NAME?
171	266	Hex2Cer 41:2;3	N/A	N/A		TRUE	1	0.35592	0.775	0	0	0	1.55	0	0.775	INF	INF
172	75	SM 33:1;2	N/A	N/A		TRUE	0.988629	0.36102	126.175	86.6	115.9	86.8	71.1663	36.6745	39.575	1.45699	0.163455
173	16	Cer 37:1;2	N/A	N/A		TRUE	0.985814	0.36229	37.625	21.45	30.9	15.55	19.25	26.5762	16.175	1.75408	0.244049
174	182	HexCer 39:0;2	N/A	N/A		TRUE	0.970876	0.3691	98.775	60.625	93.4	52.3	74.5056	25.0023	38.15	1.62928	0.211995
175	52	Cer 38:1;3	N/A	N/A		TRUE	0.970844	0.36912	3304.35	3024.07	3313.05	3009.7	468.577	337.354	280.275	1.09268	0.0384935
176	212	Hex2Cer 32:2;3	N/A	N/A		TRUE	0.970274	0.36938	23.825	19.35	23.5	19.35	7.76847	4.9736	4.475	1.23127	0.0903519
177	170	HexCer 37:0;2	N/A	N/A		TRUE	0.967256	0.37077	28.025	9.925	18.9	9.75	35.6264	11.464	18.1	2.82368	0.450815
178	234	Hex2Cer 36:1;2	N/A	N/A		TRUE	0.966832	0.37097	1.775	0.95	2.25	0.65	1.21209	1.20139	0.825	1.86842	0.271475
179	106	SM 38:0;2	N/A	N/A		TRUE	-0.965842	0.37142	186.375	231.225	208.35	245.5	50.9977	77.6177	-44.85	0.806033	-0.0936471
180	89	SM 35:2;3	N/A	N/A		TRUE	0.965579	0.37154	68.275	45	70.3	50.05	32.2696	35.8165	23.275	1.51722	0.181049
181	84	SM 34:1;3	N/A	N/A		TRUE	0.953026	0.37738	35.3	6.7	9.6	0	58.5044	13.4	28.6	5.26866	0.7217
182	20	Cer 38:0;2	N/A	N/A		TRUE	0.918727	0.39367	296.875	228.325	313.55	232.95	98.9903	111.669	68.55	1.30023	0.11402
183	176	HexCer 38:0;2	N/A	N/A		TRUE	0.907061	0.39934	634.525	515.425	693.15	535.3	245.568	93.0516	119.1	1.23107	0.0902833
184	179	HexCer 38:0;3	N/A	N/A		TRUE	0.889593	0.40793	70.8	54.125	64.6	45.85	24.9524	27.9787	16.675	1.30808	0.116635
185	57	Cer 40:2;3	N/A	N/A		TRUE	0.856867	0.42441	14.025	4.5	6.5	0	20.329	9	9.525	3.11667	0.49369
186	174	HexCer 38:2;2	N/A	N/A		TRUE	0.836668	0.43483	9.65	3.925	8.9	0	11.21	7.85	5.725	2.4586	0.390688
187	223	Hex2Cer 34:0;2	N/A	N/A		TRUE	0.818162	0.44453	14.35	10.975	14.7	9.6	4.22808	7.08443	3.375	1.30752	0.116447
188	277	Hex2Cer 43:0;2	N/A	N/A		TRUE	-0.808268	0.44979	1.4	2.95	0	3.2	2.8	2.62107	-1.55	0.474576	-0.323694
189	108	SM 38:1;3	N/A	N/A		TRUE	-0.782539	0.46365	25691.5	26879.4	25922.2	26708.9	2105.01	2187.68	-1187.88	0.955807	-0.0196297
190	21	Cer 39:2;2	N/A	N/A		TRUE	0.732762	0.49133	10.525	4.825	9.85	0	12.2031	9.65	5.7	2.18135	0.338725
191	216	Hex2Cer 33:1;2	N/A	N/A		TRUE	-0.716822	0.50042	25.75	33.025	23.6	31.5	10.4379	17.4085	-7.275	0.779712	-0.108066
192	253	Hex2Cer 39:0;2	N/A	N/A		TRUE	-0.710403	0.50412	0.625	1.375	0	1	1.25	1.70171	-0.75	0.454545	-0.342423
193	68	Cer 43:0;3	N/A	N/A		TRUE	-0.662337	0.53236	11.775	17.9	8.1	22	13.4302	12.7161	-6.125	0.657821	-0.181892
194	239	Hex2Cer 37:2;2	N/A	N/A		TRUE	0.645975	0.5422	1.9	1.25	2.4	0.9	1.28062	1.55242	0.65	1.52	0.181844
195	53	Cer 38:0;3	N/A	N/A		TRUE	-0.63436	0.54925	29.15	42.375	15.85	43.95	37.9108	17.3577	-13.225	0.687906	-0.162471
196	97	SM 36:0;3	N/A	N/A		TRUE	-0.633115	0.55001	169.325	182.3	153.8	176	32.0006	25.6118	-12.975	0.928826	-0.0320656
197	194	HexCer 41:0;2	N/A	N/A		TRUE	0.63081	0.55142	85.95	69	87.9	70.85	52.8014	10.0023	16.95	1.24565	0.0953968
198	9	Cer 34:0;2	N/A	N/A		TRUE	0.612306	0.56281	14.55	7.575	12.9	0	17.0156	15.15	6.975	1.92079	0.28348
199	29	Cer 42:2;2	N/A	N/A		TRUE	-0.599787	0.57059	447.05	629.95	354.1	654.95	538.062	287.136	-182.9	0.709659	-0.14895
200	272	Hex2Cer 42:2;3	N/A	N/A		TRUE	-0.59684	0.57243	0.775	2.125	0	0	1.55	4.25	-1.35	0.364706	-0.438057
201	121	SM 40:0;3	N/A	N/A		TRUE	0.581085	0.58234	683.825	656.675	674.4	628.55	43.919	82.4818	27.15	1.04134	0.0175945
202	136	SM 43:2;3	N/A	N/A		TRUE	-0.555479	0.59865	20.3	28.025	13.8	26.5	25.7317	10.5588	-7.725	0.724353	-0.14005
203	278	Hex2Cer 43:2;3	N/A	N/A		TRUE	-0.54748	0.6038	0.825	1.475	0	1.4	1.65	1.70758	-0.65	0.559322	-0.252338
204	237	Hex2Cer 36:1;3	N/A	N/A		TRUE	-0.540613	0.60824	1.525	2.2	1.45	2.3	1.76517	1.76635	-0.675	0.693182	-0.159153
205	60	Cer 41:2;3	N/A	N/A		TRUE	0.53169	0.61404	47.275	37.825	55.4	39.95	17.8165	30.7598	9.45	1.24983	0.0968526
206	150	HexCer 34:2;2	N/A	N/A		TRUE	-0.525517	0.61807	4.6	6.175	4.35	7.5	4.19285	4.28359	-1.575	0.744939	-0.127879
207	74	SM 33:2;2	N/A	N/A		TRUE	0.525094	0.61835	592.9	528.825	670.45	530.05	232.866	73.0394	64.075	1.12116	0.0496695
208	241	Hex2Cer 37:0;2	N/A	N/A		TRUE	0.520908	0.62109	38.6	34.2	35.2	33.9	16.6537	2.83666	4.4	1.12865	0.0525612
209	259	Hex2Cer 40:0;2	N/A	N/A		TRUE	-0.516796	0.62379	0.65	1.125	0	1.1	1.3	1.29968	-0.475	0.577778	-0.238239
210	246	Hex2Cer 38:1;2	N/A	N/A		TRUE	0.496981	0.63689	9.35	7.9	8.65	9.65	2.09205	5.44732	1.45	1.18354	0.0731845
211	185	HexCer 39:0;3	N/A	N/A		TRUE	0.494153	0.63877	614.375	571.725	630.25	540.9	84.4002	150.578	42.65	1.0746	0.0312464
212	254	Hex2Cer 39:2;3	N/A	N/A		TRUE	-0.475968	0.65093	0.975	1.675	0.2	0.8	1.69386	2.40468	-0.7	0.58209	-0.23501
213	177	HexCer 38:2;3	N/A	N/A		TRUE	-0.458516	0.66272	7.5	11.375	7.25	7.6	8.66987	14.5094	-3.875	0.659341	-0.18089
214	41	Cer 34:1;3	N/A	N/A		TRUE	0.454113	0.66571	30.125	19.5	18.45	13.1	39.6674	24.8239	10.625	1.54487	0.188892
215	120	SM 40:1;3	N/A	N/A		TRUE	0.449202	0.66906	19628.2	19089.5	19573.5	19030.7	1497.25	1873.61	538.675	1.02822	0.0120854
216	19	Cer 38:1;2	N/A	N/A		TRUE	0.426306	0.68476	344.175	320.125	347.3	294.55	38.6827	105.992	24.05	1.07513	0.0314597
217	215	Hex2Cer 33:2;2	N/A	N/A		TRUE	0.417394	0.69091	28.05	23.25	18.8	24.95	20.8235	9.7661	4.8	1.20645	0.0815099
218	98	SM 37:2;2	N/A	N/A		TRUE	0.406081	0.69877	15.125	10.15	9.45	4.95	19.7713	14.4731	4.975	1.49015	0.173229
219	17	Cer 37:0;2	N/A	N/A		TRUE	-0.395701	0.70601	6.625	12.075	0	0	13.25	24.15	-5.45	0.548654	-0.260701
220	230	Hex2Cer 35:2;3	N/A	N/A		TRUE	-0.393039	0.70788	1.9	2.4	2.35	2.2	1.34412	2.16025	-0.5	0.791667	-0.101458
221	202	HexCer 42:0;3	N/A	N/A		TRUE	0.386355	0.71256	45.425	37.125	38.15	40	34.5886	25.4889	8.3	1.22357	0.0876285
222	31	Cer 42:0;2	N/A	N/A		TRUE	-0.340451	0.74512	52.9	62.925	43.05	47.95	42.3691	40.9046	-10.025	0.840683	-0.0753676
223	231	Hex2Cer 35:1;3	N/A	N/A		TRUE	0.332905	0.75053	3.2	2.6	3.4	2.95	2.95296	2.0672	0.6	1.23077	0.0901766
224	195	HexCer 41:2;3	N/A	N/A		TRUE	0.329576	0.75292	64.175	56.975	67.95	57.75	37.2094	22.9017	7.2	1.12637	0.0516815
225	100	SM 37:0;2	N/A	N/A		TRUE	-0.324363	0.75667	123.1	135.6	116.3	140.15	29.1325	71.3564	-12.5	0.907817	-0.0420016
226	49	Cer 37:1;3	N/A	N/A		TRUE	-0.316111	0.76263	443	475.825	482.95	432.6	138.555	154.705	-32.825	0.931015	-0.0310435
227	51	Cer 38:2;3	N/A	N/A		TRUE	0.312121	0.76551	21.825	17.075	14.45	20.3	27.9312	12.0936	4.75	1.27818	0.106594
228	220	Hex2Cer 33:0;3	N/A	N/A		TRUE	-0.300652	0.77383	2.775	3.525	1.2	3.85	4.10883	2.83005	-0.75	0.787234	-0.103896
229	13	Cer 36:1;2	N/A	N/A		TRUE	0.297908	0.77582	9.025	5.825	0	0	18.05	11.65	3.2	1.54936	0.190151
230	114	SM 39:1;3	N/A	N/A		TRUE	0.297725	0.77595	202648	199089	203106	199911	9807.59	21796.5	3558.02	1.01787	0.00769295
231	268	Hex2Cer 41:0;3	N/A	N/A		TRUE	0.287916	0.7831	0.875	0.6	0	0.4	1.75	0.765942	0.275	1.45833	0.163857
232	65	Cer 42:0;3	N/A	N/A		TRUE	-0.285446	0.7849	41.325	46.45	40.7	51.65	7.28028	35.1629	-5.125	0.889666	-0.0507729
233	129	SM 42:1;2	N/A	N/A		TRUE	0.270961	0.7955	277.15	255.525	239.15	247.6	153.978	42.0507	21.625	1.08463	0.0352815
234	107	SM 38:2;3	N/A	N/A		TRUE	-0.256288	0.80629	599.375	617.15	616.05	613.55	136.522	24.5499	-17.775	0.971198	-0.0126921
235	123	SM 41:1;2	N/A	N/A		TRUE	-0.25087	0.81028	2798.35	2879.05	2592.8	2776.5	594	247.136	-80.7	0.97197	-0.0123472
236	258	Hex2Cer 40:1;2	N/A	N/A		TRUE	0.235973	0.8213	0.95	0.675	0	0	1.9	1.35	0.275	1.40741	0.14842
237	47	Cer 36:0;3	N/A	N/A		TRUE	0.231187	0.82485	21.05	17.475	11.8	22.8	28.6177	11.7273	3.575	1.20458	0.0808349
238	119	SM 40:2;3	N/A	N/A		TRUE	0.17038	0.87031	48.175	45.05	51.8	33.3	23.2857	28.3444	3.125	1.06937	0.0291269
239	175	HexCer 38:1;2	N/A	N/A		TRUE	0.161184	0.87724	6.1	5.025	2.9	0	8.7704	10.05	1.075	1.21393	0.0841938
240	23	Cer 39:0;2	N/A	N/A		TRUE	-0.116001	0.91144	98.125	102.325	101.45	108.3	37.672	61.8425	-4.2	0.958954	-0.0182021
241	171	HexCer 37:2;3	N/A	N/A		TRUE	-0.108877	0.91685	5.725	6.475	0	5.45	11.45	7.66176	-0.75	0.88417	-0.0534643
242	229	Hex2Cer 35:0;2	N/A	N/A		TRUE	0.105953	0.91907	28.85	28.25	27.5	28.05	11.2826	0.988264	0.6	1.02124	0.00912737
243	227	Hex2Cer 35:2;2	N/A	N/A		TRUE	0.100759	0.92302	0.75	0.65	0	0	1.5	1.3	0.1	1.15385	0.0621479
244	245	Hex2Cer 38:2;2	N/A	N/A		TRUE	0.094368	0.92789	1.9	1.725	2.2	0	1.36137	3.45	0.175	1.10145	0.0419645
245	210	Hex2Cer 32:1;2	N/A	N/A		TRUE	0.0942163	0.928	909.525	901.35	931.9	915.8	104.715	138.383	8.175	1.00907	0.00392118
246	279	Hex2Cer 43:1;3	N/A	N/A		TRUE	-0.0884203	0.93242	1.425	1.575	0	1.4	2.85	1.84097	-0.15	0.904762	-0.0434657
247	14	Cer 36:0;2	N/A	N/A		TRUE	0.0616973	0.95281	5.975	5.475	0	0	11.95	10.95	0.5	1.09132	0.0379538
248	50	Cer 37:0;3	N/A	N/A		TRUE	-0.0613518	0.95307	33.775	34.825	41.3	41.7	23.1297	25.2315	-1.05	0.969849	-0.0132958
249	46	Cer 36:1;3	N/A	N/A		TRUE	0.0560504	0.95712	14.15	13.275	13.1	0	16.4287	26.55	0.875	1.06591	0.0277219
250	32	Cer 43:2;2	N/A	N/A		TRUE	-0.054928	0.95798	6.8	7.35	0	0	13.6	14.7	-0.55	0.92517	-0.0337784
251	217	Hex2Cer 33:0;2	N/A	N/A		TRUE	-0.0510034	0.96098	10.5	10.9	6.5	6.8	10.7045	11.4647	-0.4	0.963303	-0.0162372
252	275	Hex2Cer 43:2;2	N/A	N/A		TRUE	0.0396214	0.96968	1.1	1.05	0	0.9	2.2	1.23693	0.05	1.04762	0.0202034
253	262	Hex2Cer 40:0;3	N/A	N/A		TRUE	0.0248069	0.98101	0.725	0.7	0	0	1.45	1.4	0.025	1.03571	0.01524
254	236	Hex2Cer 36:2;3	N/A	N/A		TRUE	-0.0209872	0.98394	1.375	1.4	1.35	0.95	1.58824	1.77576	-0.025	0.982143	-0.00782534
255	94	SM 36:0;2	N/A	N/A		TRUE	-0.00368284	0.99718	9.575	9.625	0	0	19.15	19.25	-0.05	0.994805	-0.00226196
256	3	Cer 32:0;2	N/A	N/A		TRUE	0	1	0	0	0	0	0	0	0	NaN	NaN
257	18	Cer 38:2;2	N/A	N/A		TRUE	0	1	0	0	0	0	0	0	0	NaN	NaN
258	34	Cer 43:0;2	N/A	N/A		TRUE	0	1	0	0	0	0	0	0	0	NaN	NaN
259	40	Cer 34:2;3	N/A	N/A		TRUE	0	1	0	0	0	0	0	0	0	NaN	NaN
260	71	SM 32:0;2	N/A	N/A		TRUE	0	1	0	0	0	0	0	0	0	NaN	NaN
261	72	SM 32:2;3	N/A	N/A		TRUE	0	1	0	0	0	0	0	0	0	NaN	NaN
262	73	SM 32:0;3	N/A	N/A		TRUE	0	1	0	0	0	0	0	0	0	NaN	NaN
263	76	SM 33:0;2	N/A	N/A		TRUE	0	1	0	0	0	0	0	0	0	NaN	NaN
264	77	SM 33:2;3	N/A	N/A		TRUE	0	1	0	0	0	0	0	0	0	NaN	NaN
265	78	SM 33:1;3	N/A	N/A		TRUE	0	1	0	0	0	0	0	0	0	NaN	NaN
266	82	SM 34:0;2	N/A	N/A		TRUE	0	1	0	0	0	0	0	0	0	NaN	NaN
267	83	SM 34:2;3	N/A	N/A		TRUE	0	1	0	0	0	0	0	0	0	NaN	NaN
268	95	SM 36:2;3	N/A	N/A		TRUE	0	1	0	0	0	0	0	0	0	NaN	NaN
269	122	SM 41:2;2	N/A	N/A		TRUE	0	1	0	0	0	0	0	0	0	NaN	NaN
270	148	HexCer 33:2;3	N/A	N/A		TRUE	0	1	0	0	0	0	0	0	0	NaN	NaN
271	149	HexCer 33:1;3	N/A	N/A		TRUE	0	1	0	0	0	0	0	0	0	NaN	NaN
272	153	HexCer 34:2;3	N/A	N/A		TRUE	0	1	0	0	0	0	0	0	0	NaN	NaN
273	156	HexCer 35:2;2	N/A	N/A		TRUE	0	1	0	0	0	0	0	0	0	NaN	NaN
274	158	HexCer 35:0;2	N/A	N/A		TRUE	0	1	0	0	0	0	0	0	0	NaN	NaN
275	198	HexCer 42:1;2	N/A	N/A		TRUE	0	1	0	0	0	0	0	0	0	NaN	NaN
276	203	HexCer 43:2;2	N/A	N/A		TRUE	0	1	0	0	0	0	0	0	0	NaN	NaN
277	232	Hex2Cer 35:0;3	N/A	N/A		TRUE	0	1	0	0	0	0	0	0	0	NaN	NaN
278	248	Hex2Cer 38:2;3	N/A	N/A		TRUE	0	1	0	0	0	0	0	0	0	NaN	NaN
279	261	Hex2Cer 40:1;3	N/A	N/A		TRUE	0	1	0.725	0.725	0	0	1.45	1.45	0	1	0
280	280	Hex2Cer 43:0;3	N/A	N/A		TRUE	0	1	0	0	0	0	0	0	0	NaN	NaN

## Sheet: p<0.05
Table S1
Row	Index	Peak Name	m/z	Ret. Time	Group	Use	t-value	p-value	Mean 1	Mean 2	Median 1	Median 2	Sigma 1	Sigma 2	Delta	Fold Change	Log (Fold Change)
49	2	Cer 32:1;2	N/A	N/A		TRUE	2.46879	0.04854	23.55	0	24.3	0	19.0782	0	23.55	INF	INF
34	4	Cer 33:2;2	N/A	N/A		TRUE	2.90232	0.02725	78.175	20.025	65.75	26.05	37.7408	13.4666	58.15	3.90387	0.591495
30	11	Cer 35:1;2	N/A	N/A		TRUE	3.04101	0.02277	100.725	47.225	102.05	43.5	29.7202	18.8346	53.5	2.13287	0.328965
38	10	Cer 35:2;2	N/A	N/A		TRUE	2.74516	0.03351	98.6	31.35	90.2	19.1	26.2668	41.3594	67.25	3.14514	0.497639
11	48	Cer 37:2;3	N/A	N/A		TRUE	4.83227	0.0029	177.05	55.8	171.65	59.95	35.5007	35.4695	121.25	3.17294	0.501462
17	56	Cer 39:0;3	N/A	N/A		TRUE	4.03844	0.00681	668	347.475	688.3	378.05	107.239	117.035	320.525	1.92244	0.283853
18	54	Cer 39:2;3	N/A	N/A		TRUE	3.80033	0.00896	518.125	272.675	539.15	295.2	62.7036	112.933	245.45	1.90016	0.278789
29	25	Cer 40:0;2	N/A	N/A		TRUE	3.10388	0.02101	291.35	156.975	287.2	142.2	53.7138	67.9104	134.375	1.85603	0.268585
1	62	Cer 41:0;3	N/A	N/A		TRUE	7.21946	0.00036	452	249.025	448.15	255.7	48.3258	28.7477	202.975	1.81508	0.258895
3	27	Cer 41:1;2	N/A	N/A		TRUE	6.72099	0.00053	1345.95	613.95	1309.1	644.95	105.739	190.439	732	2.19228	0.340896
15	61	Cer 41:1;3	N/A	N/A		TRUE	4.31084	0.00503	42651.2	28784.5	43190.8	28280.9	4588.29	4509.59	13866.7	1.48174	0.170773
16	64	Cer 42:1;3	N/A	N/A		TRUE	4.29527	0.00512	5097.6	3443.5	5009.55	3440	571.648	516.161	1654.1	1.48035	0.170366
2	67	Cer 43:1;3	N/A	N/A		TRUE	7.2116	0.00036	1098.62	489.625	1129.55	465.5	72.5613	152.513	609	2.24381	0.350986
41	211	Hex2Cer 32:0;2	N/A	N/A		TRUE	2.70734	0.03523	326.925	257.425	338.65	256.25	49.5456	13.4621	69.5	1.26998	0.103797
46	218	Hex2Cer 33:2;3	N/A	N/A		TRUE	2.54557	0.04375	11.55	4.975	9.15	4.7	5.10849	0.767572	6.575	2.32161	0.365789
47	235	Hex2Cer 36:0;2	N/A	N/A		TRUE	2.51008	0.0459	7.45	2.525	6.5	1.5	2.18861	3.25717	4.925	2.9505	0.469895
45	233	Hex2Cer 36:2;2	N/A	N/A		TRUE	2.56387	0.04269	3.3	0	3.7	0	2.57423	0	3.3	INF	INF
21	240	Hex2Cer 37:1;2	N/A	N/A		TRUE	3.37951	0.01487	27.075	9.125	27.05	7.6	8.63959	6.18082	17.95	2.96712	0.472336
22	247	Hex2Cer 38:0;2	N/A	N/A		TRUE	3.30365	0.01633	10.45	3.825	11.15	4.45	2.82902	2.84297	6.625	2.73203	0.436485
14	252	Hex2Cer 39:1;2	N/A	N/A		TRUE	4.35498	0.0048	4.35	0.75	4.45	0.5	1.34784	0.957427	3.6	5.8	0.763428
44	251	Hex2Cer 39:2;2	N/A	N/A		TRUE	-2.57923	0.04181	0.225	2.325	0	2.95	0.45	1.56498	-2.1	0.0967742	-1.01424
8	155	HexCer 34:0;3	N/A	N/A		TRUE	5.0802	0.00227	40.875	0	42.5	0	16.0919	0	40.875	INF	INF
20	161	HexCer 35:0;3	N/A	N/A		TRUE	3.38912	0.01469	301.8	65.6	292.25	65.65	130.713	48.4034	236.2	4.60061	0.662815
39	160	HexCer 35:1;3	N/A	N/A		TRUE	2.71472	0.03489	147.35	39.325	150.75	41.95	73.5717	30.3466	108.025	3.74698	0.573681
42	166	HexCer 36:1;3	N/A	N/A		TRUE	2.63854	0.03862	25.5	0	30.05	0	19.3289	0	25.5	INF	INF
43	172	HexCer 37:1;3	N/A	N/A		TRUE	2.58393	0.04155	1347.8	699.325	1297.45	705.3	492.135	98.6738	648.475	1.92729	0.284946
40	189	HexCer 40:2;3	N/A	N/A		TRUE	2.70974	0.03512	1103.47	413.75	1088.3	441.9	498.472	103.338	689.725	2.66701	0.426024
27	193	HexCer 41:1;2	N/A	N/A		TRUE	3.22647	0.01799	134.85	30.925	138.5	28.5	57.6192	28.8095	103.925	4.36055	0.639541
25	196	HexCer 41:1;3	N/A	N/A		TRUE	3.24522	0.01757	56369.3	31803.5	57956.7	31424.8	14474.7	4437.91	24565.8	1.77243	0.248568
33	201	HexCer 42:1;3	N/A	N/A		TRUE	2.96261	0.0252	5625.45	3128.55	5659.15	3097.15	1620.37	464.393	2496.9	1.7981	0.254814
35	207	HexCer 43:1;3	N/A	N/A		TRUE	2.83522	0.02975	862.3	314.9	904.35	327.2	377.429	81.5698	547.4	2.73833	0.437486
48	206	HexCer 43:2;3	N/A	N/A		TRUE	-2.49415	0.0469	18.6	55.075	24.3	56	12.4419	26.4702	-36.475	0.337721	-0.471442
4	70	SM 32:1;2	N/A	N/A		TRUE	6.22632	0.00079	192.15	41.975	182.4	47.1	33.3864	34.8185	150.175	4.57772	0.66065
5	69	SM 32:2;2	N/A	N/A		TRUE	5.35594	0.00173	749.4	480.375	757.25	484.95	77.0962	64.4058	269.025	1.56003	0.193133
50	81	SM 34:1;2	N/A	N/A		TRUE	2.44906	0.04985	401.55	64.1	376.05	64.9	273.719	31.9268	337.45	6.26443	0.796882
10	91	SM 35:0;3	N/A	N/A		TRUE	4.8711	0.00279	592.05	382.175	586.15	394.25	38.3117	77.1865	209.875	1.54916	0.190096
19	87	SM 35:1;2	N/A	N/A		TRUE	3.58403	0.01159	610.475	500.65	605.6	524.45	26.5437	55.2393	109.825	1.21936	0.0861337
26	90	SM 35:1;3	N/A	N/A		TRUE	3.24487	0.01758	375.475	250.7	364.75	247.95	61.6772	45.9399	124.775	1.49771	0.175427
32	86	SM 35:2;2	N/A	N/A		TRUE	2.99287	0.02423	164.4	84.475	154.05	79.45	43.477	31.0227	79.925	1.94614	0.289174
9	92	SM 36:2;2	N/A	N/A		TRUE	4.91518	0.00267	263.075	110.525	255.35	101.2	45.5512	42.168	152.55	2.38023	0.376619
6	105	SM 38:1;2	N/A	N/A		TRUE	-5.26931	0.00188	4835.48	7066.95	4829.6	7154.25	463.973	708.583	-2231.47	0.684238	-0.164793
23	104	SM 38:2;2	N/A	N/A		TRUE	3.29801	0.01645	39.525	6.45	39.65	0	15.3589	12.9	33.075	6.12791	0.787312
37	112	SM 39:0;2	N/A	N/A		TRUE	-2.76783	0.03252	1032.97	1475.67	1057.95	1444.9	236.254	215.67	-442.7	0.700002	-0.154901
7	127	SM 41:0;3	N/A	N/A		TRUE	5.07843	0.00227	4363.77	3137.6	4257.1	3160.2	368.06	312.602	1226.17	1.3908	0.143265
28	126	SM 41:1;3	N/A	N/A		TRUE	3.12667	0.02041	60255.6	46687.4	60327.6	47219.1	5424.95	6774.52	13568.1	1.29062	0.110797
12	130	SM 42:0;2	N/A	N/A		TRUE	4.6295	0.00358	597	366.05	624.95	373	78.652	61.3884	230.95	1.63092	0.212434
31	132	SM 42:1;3	N/A	N/A		TRUE	3.00681	0.0238	7803.9	6094.32	7808.8	6037.85	950.771	623.788	1709.58	1.28052	0.107386
36	135	SM 43:0;2	N/A	N/A		TRUE	2.77051	0.0324	17.625	0	20.05	0	12.7233	0	17.625	INF	INF
13	138	SM 43:0;3	N/A	N/A		TRUE	4.36855	0.00473	126.175	34.65	127.55	35.6	39.1587	14.9116	91.525	3.64141	0.56127
24	137	SM 43:1;3	N/A	N/A		TRUE	3.27228	0.01699	1132.95	846.375	1136.65	892.15	128.656	118.854	286.575	1.33859	0.126648
